# Supplementary material for: Fine manipulation of sound via lossy metamaterials with independent and arbitrary reflection amplitude and phase
Source: PubMed Central journal article supplement (PMC5915438; doi:10.1038/s41467-018-04103-0), 2018-04-24
Supplement: 41467_2018_4103_MOESM1_ESM.pdf [file 41467_2018_4103_MOESM1_ESM.pdf]

## **Supplementary Information**

**Fine manipulation of sound via lossy metamaterials with independent and arbitrary reflection amplitude and phase**

*Zhu et al.*

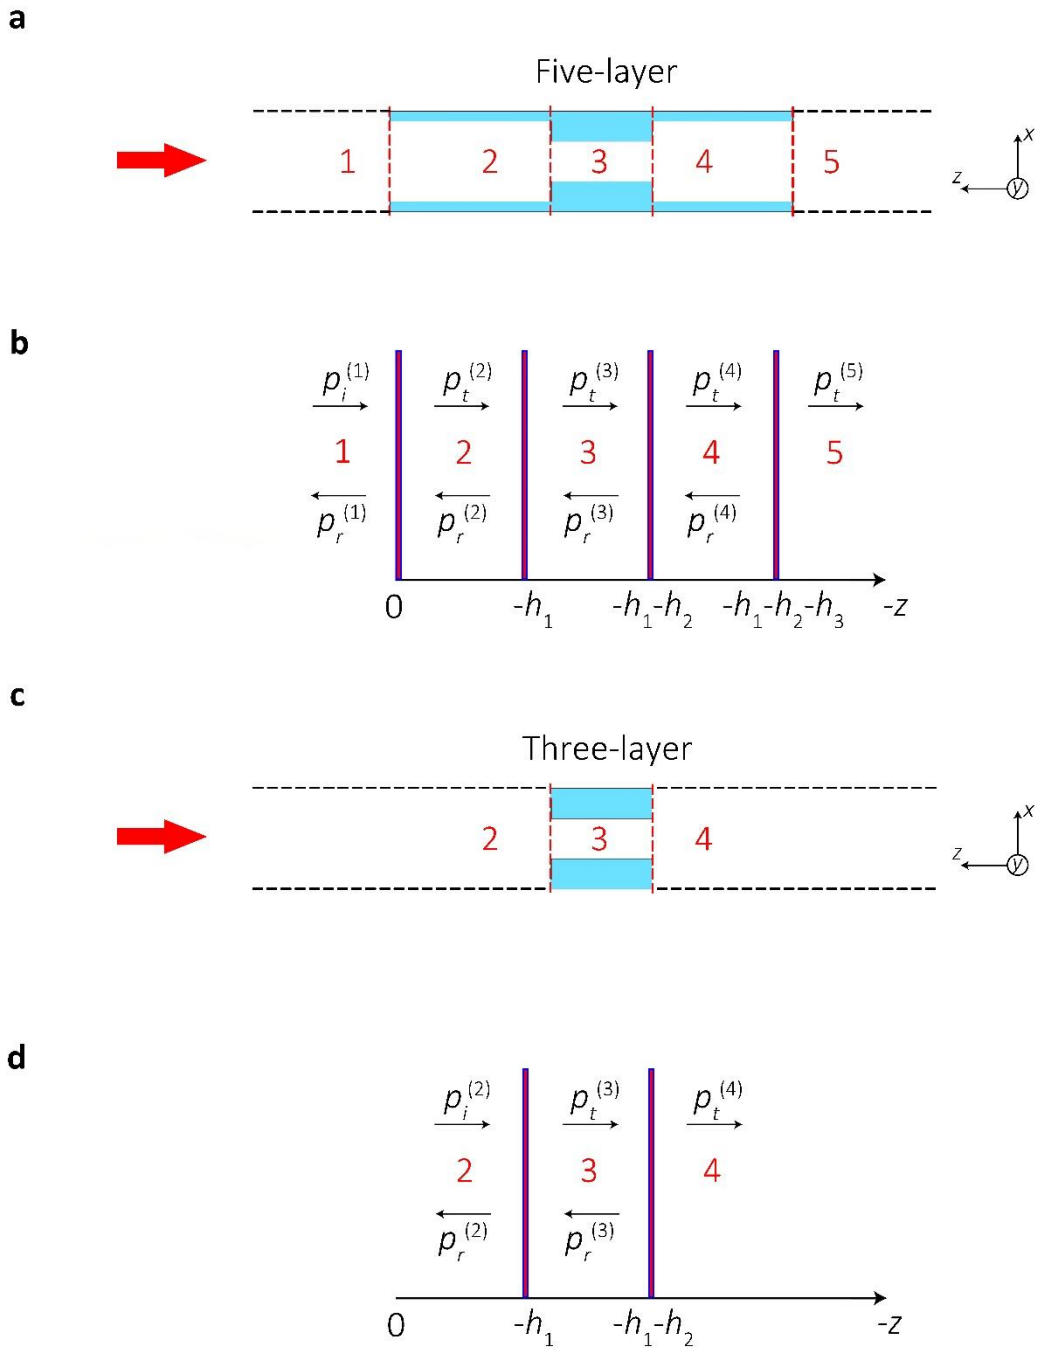

**Supplementary Figure 1 | Illustration of the analytical model.** (a) The lossy acoustic metamaterial (LAM) unit-cell can be regarded as a five-layer structure. (b) The analytical equivalence of the five-layer structure. (c) At the extreme case of  $\beta=1$ , the LAM unit-cell is simplified into a three-layer structure. (d) The analytical equivalence of the three-layer structure.

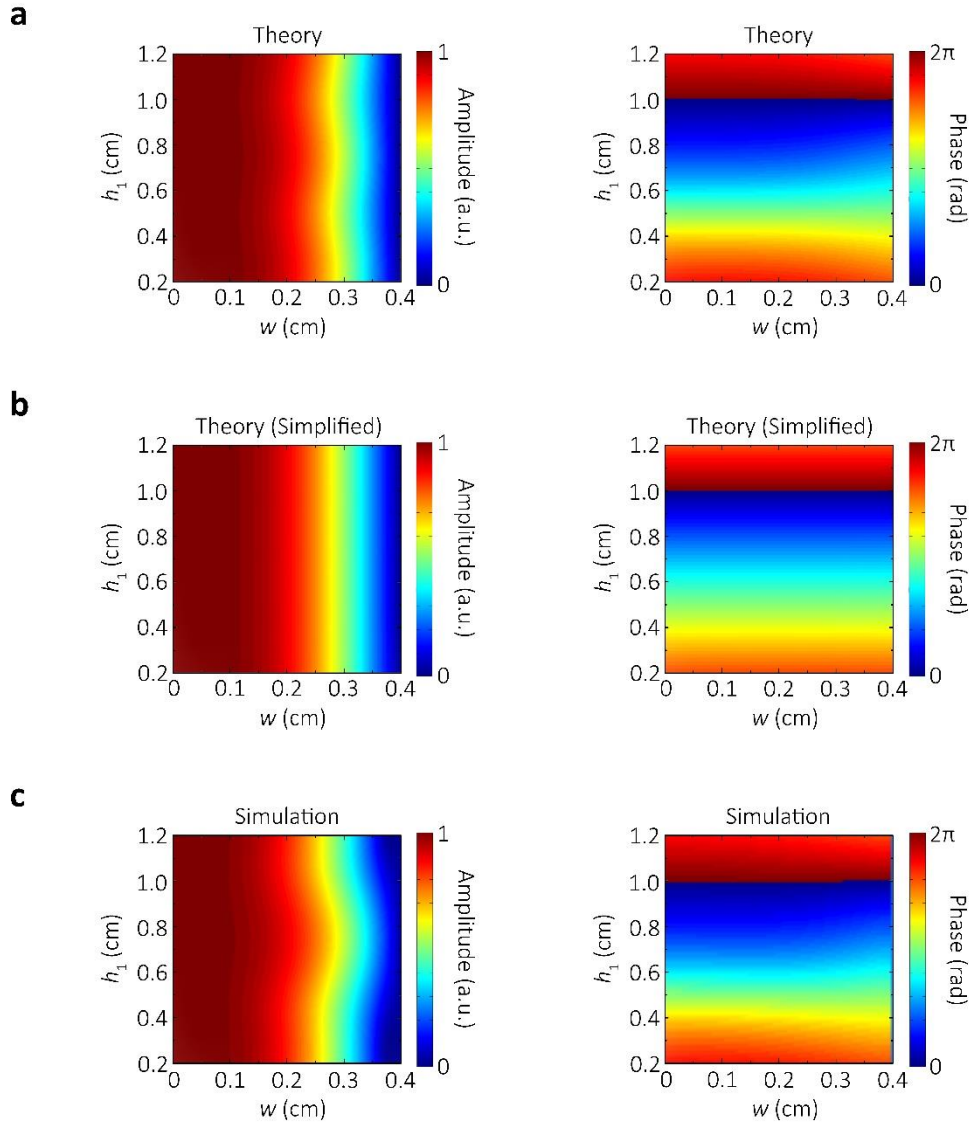

**Supplementary Figure 2 | Analytical and numerical calculations of reflection amplitude  $A$  and phase  $\phi$ .** (a)  $A$  and  $\phi$  calculated by Supplementary Eqs. (29) and (30) for different parameters of  $h_1$  and  $w$ , when  $\beta=0.8$  and  $h=2\text{cm}$ . (b)  $A$  and  $\phi$  calculated by Supplementary Eqs. (37) and (39) for different parameters of  $h_1$  and  $w$ , when  $\beta=1$ . (c) Numerical calculations of  $A$  and  $\phi$  for different parameters of  $h_1$  and  $w$ , when  $\beta=0.8$  and  $h=2\text{cm}$ .

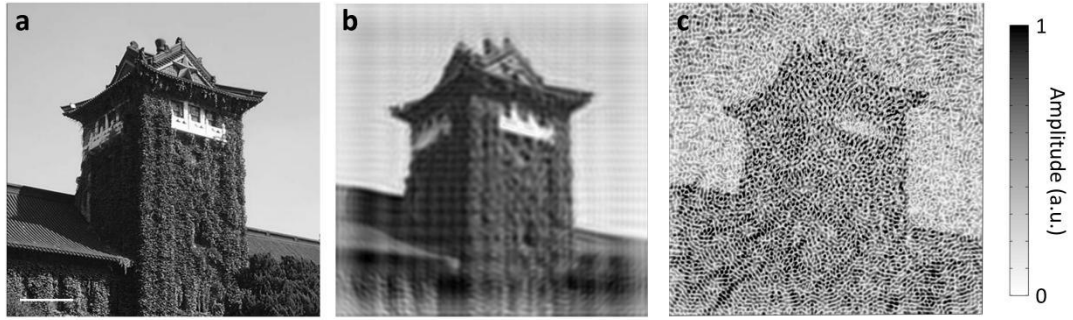

**Supplementary Figure 3 | Simulations for a complicated image.** (a) The target image with a complex amplitude distribution. (Scale bar, 20cm) (b) The generated holographic image via the amplitude-phase-modulation (APM) method. (c) The generated holographic image via the phase-modulation (PM) method. Rights for use of this image are from Nanjing University. All rights reserved.

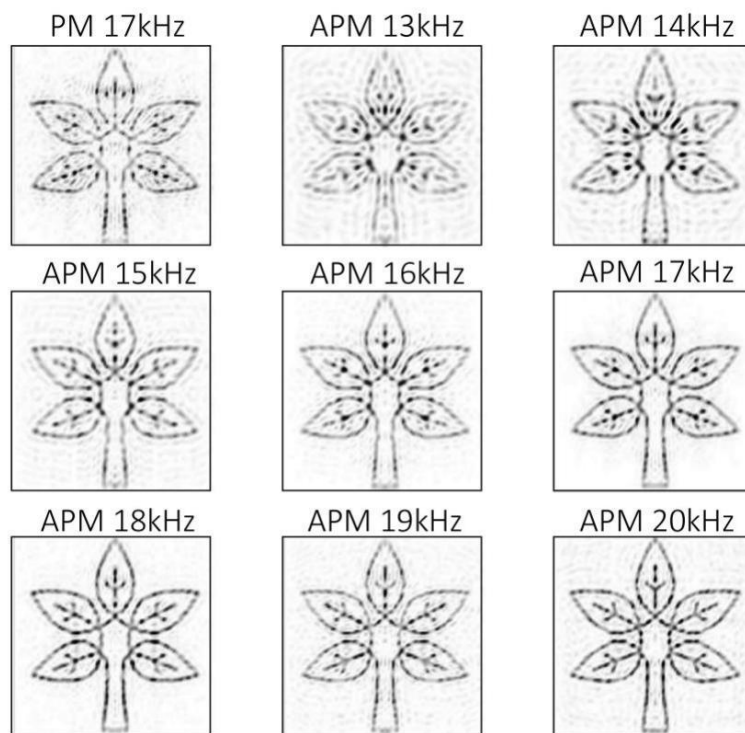

**Supplementary Figure 4 | The holographic images calculated by the PM or APM method at different frequencies.** Rights for use of this image are from Dreamstime

(www.dreamstime.com). All rights reserved.

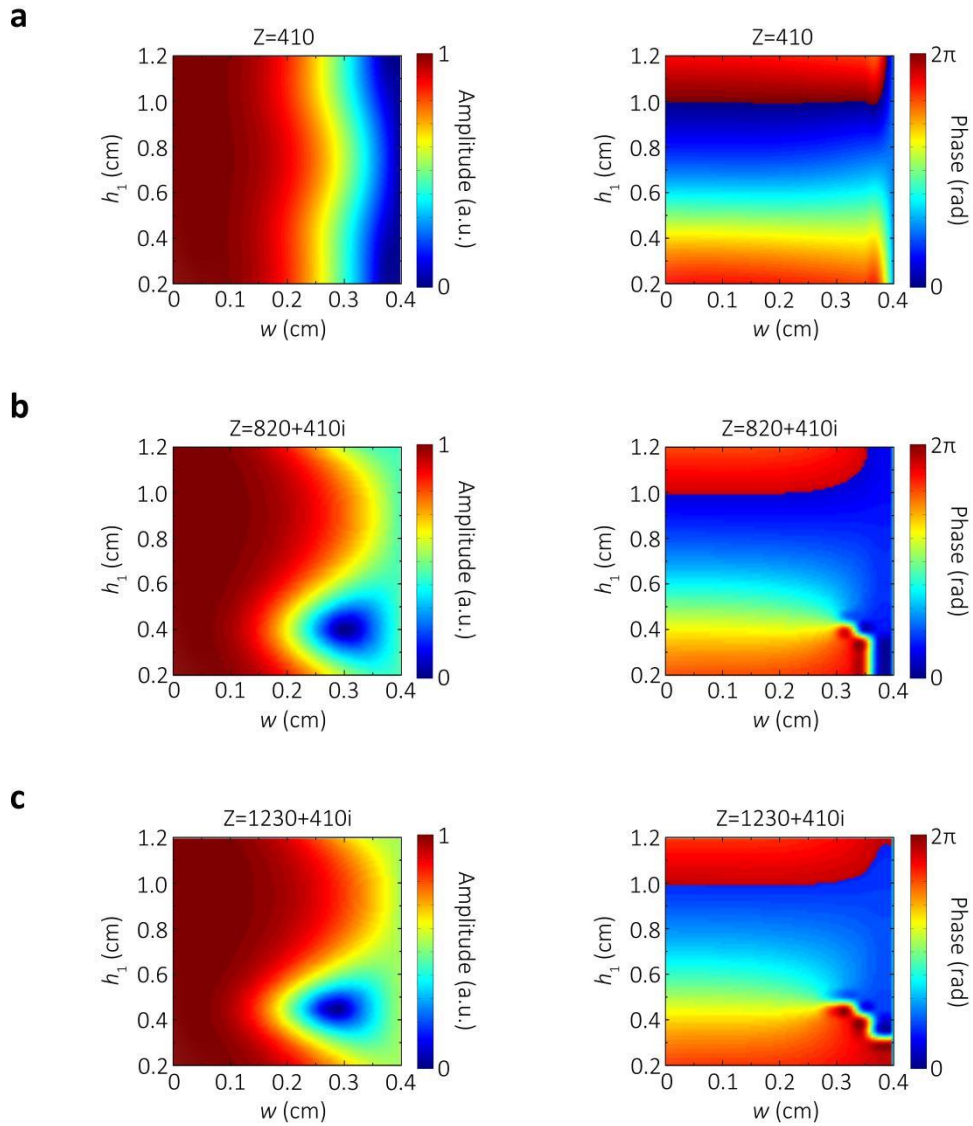

**Supplementary Figure 5 | The calculated reflection amplitude and phase for different back impedances. (a)  $Z=410\text{N}\cdot\text{s}\cdot\text{m}^{-3}$ , (b)  $Z=820+410i\text{N}\cdot\text{s}\cdot\text{m}^{-3}$ , (c)  $Z=1230+410i\text{N}\cdot\text{s}\cdot\text{m}^{-3}$ .**

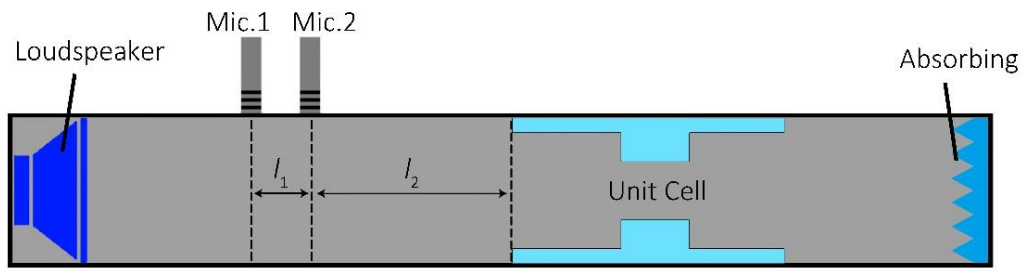

**Supplementary Figure 6 | Schematic of the acoustic impedance tube.** The loudspeaker and a pair of microphones (Mic. 1 and Mic. 2) are set in front of the unit cell for measuring the reflection amplitude and phase. The transmitted sound is absorbed by the absorbing back wall.

**Supplementary Note 1. Analytical derivation of reflection amplitude and phase.**

Supplementary Fig. 1(a) shows a general condition ( $\beta = d/D < 1$ ), where the unit-cell is divided into five parts with different cross sections, defined as Medium 1 to Medium 5, respectively. The media have different acoustic impedances. As shown in Supplementary Fig. 1(b),  $p_i^{(1)}$  denotes the incident waves, while  $p_t^{(n)}$  and  $p_r^{(n)}$  are the transmitted and reflected waves in the  $n$ th medium. The widths of Media 2, 3, and 4 are  $h_1$ ,  $h_2$ , and  $h_3$ , respectively. The acoustic pressures in Media 1-5 are expressed as follows

$$p_i^{(1)} = p_{0i}^{(1)} \exp(ik_0z), p_r^{(1)} = p_{0r}^{(1)} \exp(-ik_0z), \quad (1)$$

$$p_t^{(2)} = p_{0t}^{(2)} \exp(ik_0z), p_r^{(2)} = p_{0r}^{(2)} \exp(-ik_0z), \quad (2)$$

$$p_t^{(3)} = p_{0t}^{(3)} \exp[ik_0(z+h_1)], p_r^{(3)} = p_{0r}^{(3)} \exp[-ik_0(z+h_1)], \quad (3)$$

$$p_t^{(4)} = p_{0t}^{(4)} \exp[ik_0(z+h_1+h_2)], p_r^{(4)} = p_{0r}^{(4)} \exp[-ik_0(z+h_1+h_2)], \quad (4)$$

$$p_t^{(5)} = p_{0t}^{(5)} \exp[ik_0(z+h_1+h_2+h_3)]. \quad (5)$$

The boundary conditions at the four interfaces are expressed as

$$p_{0i}^{(1)} + p_{0r}^{(1)} = p_{0t}^{(2)} + p_{0r}^{(2)}, \quad (7)$$

$$\frac{p_{0i}^{(1)} - p_{0r}^{(1)}}{R_1} = \frac{p_{0t}^{(2)} - p_{0r}^{(2)}}{R_2}, \quad (8)$$

$$p_{0t}^{(2)} \exp(-ik_0h_1) + p_{0r}^{(2)} \exp(ik_0h_1) = p_{0t}^{(3)} + p_{0r}^{(3)}, \quad (9)$$

$$\frac{p_{0t}^{(2)} \exp(-ik_0h_1) - p_{0r}^{(2)} \exp(ik_0h_1)}{R_2} = \frac{p_{0t}^{(3)} - p_{0r}^{(3)}}{R_3}, \quad (10)$$

$$p_{0t}^{(3)} \exp(-ik_0h_2) + p_{0r}^{(3)} \exp(ik_0h_2) = p_{0t}^{(4)} + p_{0r}^{(4)}, \quad (11)$$

$$\frac{p_{0t}^{(3)} \exp(-ik_0h_2) - p_{0r}^{(3)} \exp(ik_0h_2)}{R_3} = \frac{p_{0t}^{(4)} - p_{0r}^{(4)}}{R_4}, \quad (12)$$

$$\frac{p_{0i}^{(4)} \exp(-ik_0 h_3) - p_{0r}^{(4)} \exp(ik_0 h_3)}{R_4} = \frac{p_{0i}^{(5)}}{R_5}, \quad (13)$$

$$p_{0i}^{(4)} \exp(-ik_0 h_3) + p_{0r}^{(4)} \exp(ik_0 h_3) = p_{0i}^{(5)}, \quad (14)$$

where  $R_1$ ,  $R_2$ ,  $R_3$ ,  $R_4$ , and  $R_5$  are the normalized impedances of Media 1-5 and are proportional to the cross section areas

$$R_1 = R_5 = 1, \quad (15)$$

$$R_2 = R_4 = \beta^2, \quad (16)$$

$$R_3 = (w/0.005)^2. \quad (17)$$

The relations of wave components in two neighboring media are characterized by

$$\begin{bmatrix} p_{0i}^{(2)} \\ p_{0r}^{(2)} \end{bmatrix} = Q_1 \begin{bmatrix} p_{0i}^{(1)} \\ p_{0r}^{(1)} \end{bmatrix}, \quad (18)$$

$$\begin{bmatrix} p_{0i}^{(3)} \\ p_{0r}^{(3)} \end{bmatrix} = Q_2 \begin{bmatrix} p_{0i}^{(2)} \\ p_{0r}^{(2)} \end{bmatrix}, \quad (19)$$

$$\begin{bmatrix} p_{0i}^{(4)} \\ p_{0r}^{(4)} \end{bmatrix} = Q_3 \begin{bmatrix} p_{0i}^{(3)} \\ p_{0r}^{(3)} \end{bmatrix}, \quad (20)$$

$$\begin{bmatrix} p_{0i}^{(5)} \\ 0 \end{bmatrix} = Q_4 \begin{bmatrix} p_{0i}^{(4)} \\ p_{0r}^{(4)} \end{bmatrix}, \quad (21)$$

where  $Q_1$ ,  $Q_2$ ,  $Q_3$ , and  $Q_4$  are deduced from Supplementary Eqs. (7-14)

$$Q_1 = \frac{1}{2} \begin{bmatrix} 1 + R_{12}, & 1 - R_{12} \\ 1 - R_{12}, & 1 + R_{12} \end{bmatrix}, \quad (22)$$

$$Q_2 = \frac{1}{2} \begin{bmatrix} (1 + R_{23}) \exp(-ik_0 h_1), & (1 - R_{23}) \exp(ik_0 h_1) \\ (1 - R_{23}) \exp(-ik_0 h_1), & (1 + R_{23}) \exp(ik_0 h_1) \end{bmatrix}, \quad (23)$$

$$Q_3 = \frac{1}{2} \begin{bmatrix} (1 + R_{34}) \exp(-ik_0 h_2), & (1 - R_{34}) \exp(ik_0 h_2) \\ (1 - R_{34}) \exp(-ik_0 h_2), & (1 + R_{34}) \exp(ik_0 h_2) \end{bmatrix}, \quad (24)$$

$$Q_4 = \frac{1}{2} \begin{bmatrix} (1 + R_{45}) \exp(-ik_0 h_3), & (1 - R_{45}) \exp(ik_0 h_3) \\ (1 - R_{45}) \exp(-ik_0 h_3), & (1 + R_{45}) \exp(ik_0 h_3) \end{bmatrix}. \quad (25)$$

where the ratios of normalized impedances are denoted by



$$R_{12} = \frac{R_2}{R_1}, R_{23} = \frac{R_3}{R_2}, R_{34} = \frac{R_4}{R_3}, R_{45} = \frac{R_5}{R_4}. \quad (26)$$

We finally obtain the relation of the incident, reflected, and transmitted waves for the unit-cell based on transfer matrix method

$$\begin{bmatrix} p_{0i}^{(5)} \\ 0 \end{bmatrix} = Q \begin{bmatrix} p_{0i}^{(1)} \\ p_{0r}^{(1)} \end{bmatrix}, \quad (27)$$

where  $Q$  is derived by

$$Q = \begin{bmatrix} q_{11} & q_{12} \\ q_{21} & q_{22} \end{bmatrix} = Q_4 Q_3 Q_2 Q_1. \quad (28)$$

The normalized amplitude and phase of reflection ( $A$  and  $\phi$ ) can be calculated by

$$A = \frac{|p_{0r}^{(1)}|}{|p_{0i}^{(1)}|} = \left| \frac{q_{21}}{q_{22}} \right|, \quad (29)$$

$$\phi = \arg \left( \frac{q_{21}}{q_{22}} \right). \quad (30)$$

### Supplementary Note 2. Reflection amplitude and phase at $\beta = 1$ .

At the extreme case of  $\beta = 1$ , the five-layer structure is simplified to a three-layer structure, as shown in Supplementary Figs. 1c and 1d. In this case, the relation of the incident, reflected, and transmitted waves is

$$\begin{bmatrix} p_{0r}^{(4)} \\ 0 \end{bmatrix} = Q \begin{bmatrix} p_{0i}^{(2)} \\ p_{0r}^{(2)} \end{bmatrix}, \quad (31)$$

where  $Q$  is

$$Q = \begin{bmatrix} q'_{11} & q'_{12} \\ q'_{21} & q'_{22} \end{bmatrix} = Q_3 Q_2, \quad (32)$$

and

$$Q_2 = \frac{1}{2} \begin{bmatrix} 1 + R_{23}, & 1 - R_{23} \\ 1 - R_{23}, & 1 + R_{23} \end{bmatrix}, \quad (33)$$

$$Q_3 = \frac{1}{2} \begin{bmatrix} (1 + R_{34}) \exp(-ik_0 h_2), & (1 - R_{34}) \exp(ik_0 h_2) \\ (1 - R_{34}) \exp(-ik_0 h_2), & (1 + R_{34}) \exp(ik_0 h_2) \end{bmatrix}, \quad (34)$$

The reflection amplitude is calculated by

$$A = \frac{|P_{0r}^{(1)}|}{|P_{0i}^{(1)}|} = \frac{|q'_{21}|}{|q'_{22}|}. \quad (35)$$

We can further obtain

$$A = \sqrt{1 - \frac{4}{4 \cos^2 k_0 h_2 + (R_{23} + 1/R_{23})^2 \sin^2 k_0 h_2}}. \quad (36)$$

Supplementary Eq. (36) is agreed with the result in Supplementary Ref. 1. In our model, at the particular case of  $h_2 = \lambda/4$  or  $kh_2 = \pi/2$ , we can obtain a simplified expression of reflection amplitude

$$A = \frac{d^4 - w^4}{d^4 + w^4}. \quad (37)$$

And the reflection phase is thus expressed by

$$\phi = \arg \left( \frac{q'_{21}}{q'_{22}} \right) - \frac{4\pi h_1}{\lambda}, \quad (38)$$

where the term  $-4\pi h_1/\lambda$  is the phase delay in Medium 2. By combining above equations, we will get  $q'_{21}/q'_{22} = (d^4 - w^4)/(d^4 + w^4)$ , leading to the simplified expression of reflection phase

$$\phi = -\frac{4\pi h_1}{\lambda}. \quad (39)$$

### Supplementary Note 3. Reflection amplitude and phase at $\beta < 1$ .

As aforementioned, Supplementary Eqs. (37) and (39) are the exact solutions at

$\beta = 1$ , which manifests a decoupling condition. However, in our proposed model, we focus on the more practical quasi-decoupling condition, where the structural parameters  $\beta = 0.8$  and  $h = n\lambda / 2$  ( $n = 2, 3, 4, \dots$ ). Supplementary Fig. 2 shows the results of the simplified case that  $\beta = 1$  and the practical case that  $\beta = 0.8$  and  $h = 2\text{cm}$ . To be specific, Supplementary Fig. 2(a) gives the analytical results of the reflection amplitude  $A$  and phase  $\phi$ , calculated by Supplementary Eqs. (29) and (30), when  $\beta = 0.8$  and  $h = 2\text{cm}$ . Supplementary Fig. 2(b) gives the simplified calculations of  $A$  and  $\phi$  by Supplementary Eqs. (37) and (39), when  $\beta = 1$ . Clearly, we observe a good agreement between the two results of the quasi-decoupling and decoupling cases. Supplementary Fig. 2(c) shows the numerical calculations of  $A$  and  $\phi$  by a finite element solver with the parameters  $\beta = 0.8$  and  $h = 2\text{cm}$ , which however has some discrepancy to the result of Supplementary Fig. 2(a). Such discrepancy is attributed to the fact that the size of unit cells (or pixels) is not deep-subwavelength. If we further increase the pixel density, the numerical simulation will be remarkably consistent with the analytical solution.

#### Supplementary Note 4. Calculation of the coupling coefficients $\overline{M}_{A(\phi),h_1(w)}$ .

The coupling coefficients  $\overline{M}_{A(\phi),h_1(w)}$  in the manuscript are calculated by

$$\overline{M}_{A(\phi),h_1(w)} = \overline{M}_{A(\phi),h_1(w)}(\beta, h) / \max[\overline{M}_{A(\phi),h_1(w)}(\beta, h)], \quad (40)$$

where

$$\overline{M}_{A,h_1}(\beta, h) = \int_0^{\beta D} \int_{0.1\lambda}^{0.6\lambda} M_{A,h_1} dw dh_1 = \int_0^{\beta D} \int_{0.1\lambda}^{0.6\lambda} \frac{\partial A}{\partial h_1} dw dh_1, \quad (41)$$

$$\overline{M}_{A,w}(\beta, h) = \int_0^{\beta D} \int_{0.1\lambda}^{0.6\lambda} M_{A,w} dw dh_1 = \int_0^{\beta D} \int_{0.1\lambda}^{0.6\lambda} \frac{\partial A}{\partial w} dw dh_1, \quad (42)$$

$$\overline{M}_{\phi,h_1}(\beta, h) = \int_0^{\beta D} \int_{0.1\lambda}^{0.6\lambda} M_{\phi,h_1} dw dh_1 = \int_0^{\beta D} \int_{0.1\lambda}^{0.6\lambda} \frac{\partial \phi}{\partial h_1} dw dh_1, \quad (43)$$

$$\overline{M}_{\phi,w}(\beta, h) = \int_0^{\beta D} \int_{0.1\lambda}^{0.6\lambda} M_{\phi,w} dw dh_1 = \int_0^{\beta D} \int_{0.1\lambda}^{0.6\lambda} \frac{\partial \phi}{\partial w} dw dh_1, \quad (44)$$

with  $A$  and  $\phi$  being calculated by Supplementary Eqs. (29) and (30).

### Supplementary Note 5. Calculation of the correlation between two images.

The correlation for evaluating the similarity between two images is calculated by

$$\text{Correlation} = \frac{\sum_m \sum_n (A_{mn} - \overline{A})(B_{mn} - \overline{B})}{\sqrt{\left( \sum_m \sum_n (A_{mn} - \overline{A})^2 \right) \left( \sum_m \sum_n (B_{mn} - \overline{B})^2 \right)}}, \quad (45)$$

where  $A$  and  $B$  are the data matrices of the two images, and  $\overline{A}$  and  $\overline{B}$  are the mean values of the elements in the matrices  $A$  and  $B$ , respectively.

### Supplementary Note 6. The method of measuring the reflection amplitude and phase.

By using an acoustic impedance tube shown in Supplementary Fig. 6, the reflectance factor  $r = Ae^{i\varphi}$  can be obtained based on the transfer function method in Supplementary Ref. 2, as follows

$$r = \frac{H_{12} - e^{-ik_0 l_1}}{e^{ik_0 l_1} - H_{12}} e^{2ik(l_1+l_2)}, \quad (46)$$

where  $H_{12} = p_2 / p_1$  is the transfer function between the acoustic pressure measured by the Microphones 1 and 2 and processed by the Brüel&Kjær PULSE Multi-analyzer system. Then, the reflected amplitude and phase can be directly calculated from

$$A = |r|, \quad (47)$$

$$\phi = \arg(r). \quad (48)$$

### **Supplementary References**

1. Kinsler, L. *Fundamentals of Acoustic* (Wiley, New York, 1982).
2. ISO, EN. 10534-2. Acoustics-Determination of sound absorption coefficient and impedance in impedance tubes-Part 2 (1998).
