# Supplementary material for: Fine manipulation of sound via lossy metamaterials with independent and arbitrary reflection amplitude and phase
Source: PubMed Central journal article supplement (PMC5915438; doi:10.1038/s41467-018-04103-0), 2018-04-24
Supplement: 41467_2018_4103_MOESM2_ESM.pdf [file 41467_2018_4103_MOESM2_ESM.pdf]

Reviewers' comments:

Reviewer #1 (Remarks to the Author):

The authors in this work have designed and realized an acoustic metasurface for reflection holograms by employing an inhomogeneous profile of resonance tubes.

By tuning both 2 geometric parameters together, one on resonance condition (sliding the neck of the structure) to control the reflection phase and another on coupling (width of neck) to a loss channel to control the amplitude, they obtain total degree of freedom of both amplitudes (zero to one) and phases (full  $2\pi$  range). One can think the addition of loss can control the amplitude but the smart point of the design is that the loss component is not controlled by addition of different amount of loss materials but simply by the coupling to a background loss. Moreover, amplitude and phase can be controlled independently by exploring a concept of decoupling point, which can be achieved by choosing the right size and filling fraction of the whole structure. This is a very nice and generic concept to construct holograms. Surely this is done in acoustics in this work and I can see its generality and simplicity of the underlying principle and design may be useful for other domains as well.

When I read up to Fig. 2 to see the effect of the hyperfine control of acoustic images due to the control of amplitudes, I am quite impressed but it seems that the experimental results in Fig. 5 does not quite match the expectation of complexity of the object to be displayed. Is it only a limitation due to the number of pixels employed in this work? If the authors can further improve on this, like a 3D hologram or an image of finer resolution, that will keep the excitement and make a large difference to previous approaches.

When it comes to the experimental results, I guess you are using the same frequency (17kHz?) in the numerical simulations. However, it is worth to say it clearly to have a rough idea on the different parameters, like the size of unit cell, 2 cm wavelength, 20 wavelength away for the image, etc. There are two aspects that the authors should discuss. One on frequency dispersion. Will the design work with a reasonable bandwidth? Another is on the error analysis. A more quantitative analysis, e.g. rms error, should be done on comparing simulation and experimental results.

For the simulations, how is the hologram and airy beam simulated? with or without the structural unit cell? That should be clarified.

Please also clarify in text how the absorbing boundary is realized in experiment. Is it just an open boundary or some absorbing materials there?

On a whole, I found the manuscript very enjoyable to read, seeing its potential on applications and suitable for broad readership. I would really like to recommend its publication after the authors improve on the above issues.

Reviewer #2 (Remarks to the Author):

This manuscript describes a means to model acoustic metamaterials (AMM) that permit the independent control of both the magnitude and phase of a reflected signal using simple structured elements. The authors provide a detailed description of the behavior of these elements and the approach to determining the specific geometries that enable arbitrary control of magnitude and phase of the acoustic signal reflected from their surface. The authors state that the primary contribution of

their work is the consideration of loss in the elements and demonstration of the ability to provide full control of the reflected field despite this loss. This is indeed a unique contribution in terms of the existing acoustic metamaterial research and is therefore of interest for publication in Nature Communications. However, it is the opinion of this reviewer that several points and ambiguities need to be addressed prior to acceptance. Those points are listed below.

1) The manuscript considers losses at the back of the metamaterial elements (as described in lines 87-89 of page 5). This approach does indeed take into account the loss in the elements, but it seems too simplistic for the claims that are made in the manuscript. Specifically, the authors claim that their model clearly shows that when losses are present, regardless of losses in the AMM structures. However, the losses considered here are only for the case of a perfectly absorbing boundary at the back of the elements. It is not at all clear what this means for more general losses. The following cases should be discussed and probably analyzed in a revised manuscript if the authors wish to keep the strong statement that this work is in regards to "lossy metamaterials" in general.

a. What happens if the impedance at the back of the AMM structures is not perfectly absorbing, but instead consists of some complex impedance,  $Z_{\text{back}} = Z_r + jZ_i$ ? Can the model consider this case and still achieve the arbitrary control? This must be clearly addressed in the revision. It would be best if results from one case be shown in comparison with the current results.

b. More importantly, unless I have missed something, the present manuscript only considers loss at the back boundary, and not losses induced within the elements. Such losses, thermos-viscous in nature, are distributed within the AMM structures. It is not clear that the AMM structure, the design scheme, and the modeling is sufficient to capture these types of losses and whether they are important are not. The authors need to clearly address this point as it is highly relevant to their central points.

2) The term "leaky loss" is used throughout the manuscript. What, precisely, is meant by this term in the context of this particular case? Do the authors mean that the AMM leaks energy out the back of the hologram plane? More details need to be provided or a different term should be employed.

3) One of the key claims that the authors make is that the independent control of magnitude and phase allows for improved control of the pressure fields. This indeed seems to be the case. However, the authors do not provide any discussion on the resolution limitations of their approach in terms of wavelength. What is the minimum size of the structures at the hologram plane? Does this approach simply allow us to have a higher fidelity control (as evidenced by their results), but not to surpass standard resolution limits? A discussion on these points needs to be provided in the revised manuscript.

4) Figures 2c and 2d would be more compelling if they included the image reconstruction for both amplitude and phase control AMM and just phase controlled AMM. The current figure is good, but it lacks an ability to provide a qualitative comparison between the two different approaches.

5) Finally, it is not clear from this work why including loss at the back of the structure is necessary to get independent control of amplitude and phase. Is this truly necessary? Can it be done without losses being present? Please provide a discussion of this in the revision.

Minor points to address

1) The first sentence in the abstract should be re-written. It's seems a bit too grandiose for a scientific publication

2) Similarly, the use of the term "hyperfine" in the title seems a bit too strong of a statement. It would seem that the term 'fine' would be better.

3) Why did the authors define the coupling strengths in Eq. (1) in terms of both geometric variables rather than defining four strengths like  $M_{\{A,h\}} = (\partial A)/(\partial h)$ ,  $M_{\{A,w\}} = (\partial A)/(\partial w)$ , ...? As they are currently defined, the coupling strength can be zero if it has no dependence on either variable, but gives no information on the dependence of h and w independently?

The current definition seems to work for the design, but it seems to hide information. It would be best if the authors could provide a comment on this point in the manuscript when those parameters are introduced.

4) Line 126 of page 7 has a discussion about the case where  $\beta = 1$  and the fact that it cannot be hit in reality because of the finite impedance contrast between air and elastic solids. Isn't the  $\beta = 1$  case where portions of the AMM structure is purely air? The impedance contrast doesn't seem relevant.

5) Aren't the patterns shown in Fig 1b Fabry-Perot types of resonances? Please address in the revision.

Reviewer #3 (Remarks to the Author):

The paper "Hyperfine manipulation of sound via lossy acoustic metamaterials" by Zhu, Hu, Fan, Yang, Liang, Zhu, and Cheng reports the manipulation of both the amplitude and phase across the wavefront of an acoustic wave incident on a planar metamaterial made of discrete sub-wavelength elements. The key feature reported is the introduction of a loss (amplitude change) via controlled leaky emission from the backside of each element. The authors successfully determine the requirements for independently setting the complex amplitude and phase at each element, which leads to the demonstration of holograms that can now encode both amplitude and phase. This is in principal an interesting piece of work and an advance in the field of acoustics, as it suggests improvements in the generation of sound fields. However, these improvements are mainly shown in simulations and do not manifest themselves in the actual experiments. Important information is missing and the claimed universal improvements are not demonstrated. Therefore further work is needed and the authors are asked to address the following points:

1) Title: „hyperfine“ has a special meaning in physics. How does it relate to this work? The authors probably mean high fidelity. However, the title should be changed. Independent control of the static amplitude and phase across an acoustic wavefront is the essence of this work and this should be reflected in the title.

2) The approach the authors present is limited to reflection. The scalability, especially miniaturization, is limited by two factors, (a) the fabrication method and (b) the requirement of full absorption (or the disappearance) of transmitted wave components at the backside. Considering these limitations the results are not "universal" and are not as spectacular as the authors claim. The text should be changed accordingly.

3) The work mainly shows via simulations that the control of amplitude and phase improves holograms. This is well known from optics. The paper does not appear to demonstrate any (real) improvement in the experimental acoustic fields. A convincing experimental demonstration is missing and should be provided by the authors so that the importance of the work can be judged.

4) Please, add scale bars or coordinate axes. This applies to almost all images and plots.

5) How are the phase-only results (PM) obtained, against which the APM are compared? Do you use an optimization procedure or simply keep the phase of the APM and reset all amplitudes to 1? How does this compare to optimized PM of other published works? This information must be provided.

6) It is not clear what "Freewheeling" means (abstract).

7) p.6, Equation 1: capital M is used for both coupling strengths and transfer matrices in the SI. This

is an unnecessary source of confusion and the nomenclature should be changed.

8) p.6, L.116: What does  $(M_A)^-(M_\Phi)^-=0$  mean? Is it  $(M_A)^-=(M_\Phi)^-=0$ ?

9) p.7, L.138: Do you mean Supplementary Note 3 or 4? Regarding Supp. Note 4, why do you integrate  $w$  over  $[0, 0.4]$  and  $h$  over  $[0.2, 1.2]$ ? One would expect the ranges  $[0, \beta D]$  and  $[0, \lambda/2]$ , respectively.

10) On p.8 the authors write that "However, due to the lack of capability to modulate both amplitude and phase, the current production of acoustic holograms ...cannot guarantee high-fidelity of images". This does not seem to be correct as phase-only holograms have been shown to generate extremely high-fidelity images?

11) p. 10, L.192ff: Please choose a number of unit cells that allows comparison to either your experimental data or previously published hologram data. The images in Figure 2 are phenomenal but so is the element count of  $359 \times 359$ . The experimental data presented in Figure 5 look mediocre compared to what has been achieved with pure phase holograms in other works.

12) p.12, L.245: Reference to equation 3 not 5.

13) p.13, L.265: The Penrose pattern is shown in Figure S3.

14) At various locations throughout the manuscript and in the conclusions the authors speak of "modulating both amplitude and phase of acoustic wave in a precise, continuous and decoupled manner". This is somewhat misleading as continuous modulation suggests a temporal or dynamic control. The authors should clarify this by stating clearly in the text that they only consider fixed or static acoustic holograms.

1 **Referee #1 (Remarks to the Author):**

2

3 1. *The authors in this work have designed and realized an acoustic metasurface for*  
4 *reflection holograms by employing an inhomogeneous profile of resonance tubes.*

5 *By tuning both 2 geometric parameters together, one on resonance condition (sliding*  
6 *the neck of the structure) to control the reflection phase and another on coupling (width*  
7 *of neck) to a loss channel to control the amplitude, they obtain total degree of freedom*  
8 *of both amplitudes (zero to one) and phases (full  $2\pi$  range). One can think the addition*  
9 *of loss can control the amplitude but the smart point of the design is that the loss*  
10 *component is not controlled by addition of different amount of loss materials but simply*  
11 *by the coupling to a background loss. Moreover, amplitude and phase can be controlled*  
12 *independently by exploring a concept of decoupling point, which can be achieved by*  
13 *choosing the right size and filling fraction of the whole structure. This is a very nice*  
14 *and generic concept to construct holograms. Surely this is done in acoustics in this*  
15 *work and I can see its generality and simplicity of the underlying principle and*  
16 *design may be useful for other domains as well.*

17 *When I read up to Fig. 2 to see the effect of the hyperfine control of acoustic images*  
18 *due to the control of amplitudes, I am quite impressed but it seems that the experimental*  
19 *results in Fig. 5 does not quite match the expectation of complexity of the object to be*  
20 *displayed. Is it only a limitation due to the number of pixels employed in this work? If*  
21 *the authors can further improve on this, like a 3D hologram or an image of finer*  
22 *resolution, that will keep the excitement and make a large difference to previous*  
23 *approaches.*

24

25 **Response:** We thank the referee for the positive remarks and valuable advices. In light  
26 of the referee's report, we have made every effort to revise and improve the manuscript.  
27 It is true that holographic images can be improved by increasing the number of pixels.  
28 Following the suggestion of the referee, we have further increased the number of pixels  
29 insofar as the size of samples does not exceed the limit of our 3D printing machine, and  
30 added the experimental demonstration of projection of a 2D image with finer resolution

31 as well as production of fine distribution of acoustic energy in 3D space. A quantitative  
32 comparison between the images generated by the proposed amplitude-phase  
33 modulation (APM) method and by the previous phase modulation (PM) method has  
34 also been made to clearly show the merits of our scheme. Specifically, we have  
35 fabricated new lossy acoustic metamaterials (LAM) samples consisting of  $119 \times 119$   
36 unit cells and conducted experiments on projecting a single-plane 2-D hologram with  
37 finer resolution and multi-plane 3-D hologram as shown respectively in Figs. 5 and 6  
38 in the updated version of manuscript. We have also added discussions for clarification.

39 Please refer to

40 **Pages 13-15, lines 265-326:**

41 **Experimental verification of single-plane 2-D hologram and multi-plane 3-D**  
42 **hologram.** In this section, we choose a tree image [Fig. 5(a)] as our target object,  
43 comprising  $200 \times 200$  image pixels. Figure 5(b) presents the reflection amplitude and  
44 phase profiles on the hologram plane for projecting the tree pattern in the far field. The  
45 calculations of amplitude and phase profiles are based on Eq. (3). In the experiment, we  
46 fabricated LAM samples via 3-D printing with precision of 0.1mm. The experiments  
47 were carried out in an anechoic chamber to demonstrate the acoustic hologram  
48 projection. We record both amplitude and phase information into the LAM sample,  
49 where the sample size is  $60 \times 60 \times 2 \text{cm}^3$  with  $119 \times 119$  unit cells, as shown by the photo  
50 in Fig. 5(c). The size of image area is  $60 \times 60 \text{cm}^3$ , with a distance 20cm away from the  
51 surface of LAM. Other experimental details can be found in the Methods part. Due to  
52 the size limitations in 3-D printing, the pixel number of the target image in our  
53 experiment is less than the numerical investigations in Fig. 2.

54 We plot the simulated and measured intensity distributions on the image plane in  
55 Figs. 5(d) and 5(e), respectively, showing a good agreement between numerical and  
56 experimental results of fine 2-D hologram. Figure 5(f) shows the simulated result based  
57 on the PM method for comparison. For a quantitative evaluation of the quality of  
58 acoustic hologram, we introduce the parameter of “image correlation” which has been  
59 commonly used for measuring the similarity between the numerical/experimental  
60 image and the target one. The calculation of correlation can be referred to the

61 Supplementary Note 5. A higher value of correlation denotes a better similarity between  
62 the generated holographic image and the target image, and only when the two images  
63 are completely identical can a unitary correlation be achieved, which represents a  
64 perfect hologram. Figure 5(g) shows the relation between image correlation and the  
65 operation frequency. The results reveal that although our LAM is designed to work at  
66 17kHz, it has a relatively broad operation bandwidth, thanks to the low dispersion of  
67 the groove structure [33]. At 17kHz where the quasi-decoupled point (quasi-DP) locates,  
68 the image correlation reaches a maximum of 0.880 in simulation, and the corresponding  
69 measured data, albeit much lower than the simulated one due to the unavoidable  
70 experimental error, still reaches 0.771 and is higher than the ideal value one can achieve  
71 with PM method. We also note that the holographic image based on APM in a broad  
72 frequency range (14kHz~20kHz, correlation>0.770) is better than the one of the PM  
73 method (17kHz, correlation=0.767). The simulated holographic images at different  
74 frequencies based on PM or APM are appended in the Supplementary Fig. 4. Notice  
75 that our proposed method does not surpass standard resolution limits, which is in theory  
76 the only limitation on its performance of sound manipulation. Hence the size of each  
77 unit cell at the hologram plane is chosen as 1/4 wavelength, which is sufficiently small  
78 for avoiding spatial alias and generating smooth phase and amplitude profiles. This  
79 important feature, together with the independent control of magnitude and phase,  
80 enables controlling acoustic waves with a higher fidelity control, especially when the  
81 image plane is not far away from the sample. Figure 5(h) illustrates the comparison  
82 between the image correlations as functions of the distances of holographic image  
83 planes for APM and PM methods. Clearly, the hologram quality for APM is always  
84 much better than that of PM regardless of the distance of image plane, although for both  
85 cases the correlation slightly decreases with larger distances due to wave diffraction, as  
86 shown in Fig. 5(h). Moreover, we emphasize simultaneous control of reflection  
87 amplitude and phase can be achieved even when the back absorption is partial (see  
88 Supplementary Fig. 5). In this case, we can also project holograms with relatively  
89 higher correlations to the target image, as unveiled in Fig. 5(i).

90 At last, we demonstrated both numerically and experimentally the production of

91 precise distribution of acoustic energy in 3-D space. Here we choose to project the  
92 acoustic hologram onto multiple planes instead of a single 2-D plane, as schematically  
93 depicted at Fig. 6(a), where the holographic image is designed to be three hollow letters  
94 “N”, “J”, and “U” at three different planes that are spacing 12cm, 16cm, 20cm away  
95 from the hologram plane. The size of holographic regions at image planes 1, 2 and 3 is  
96  $60 \times 60 \text{cm}^3$ , and the bottom left corners of those holographic regions locate at (0cm,  
97 30cm), (10cm, 0cm) and (30cm, 20cm) in the  $x$ - $y$  plane. We record amplitude and phase  
98 distributions [Fig. 6(b)] into the LAM sample of  $119 \times 119$  unit cells [Fig. 6(c)]. By  
99 comparing the amplitude field patterns in simulations and experiments, we  
100 unambiguously observe a very good agreement. To be specific, the image correlations  
101 to the perfect cases of letters “N”, “J”, “U” are 0.827(0.705), 0.867(0.771), 0.858(0.776)  
102 for the results of simulations(experiments), respectively.

**[Editorial Note: Image redacted from Peer Review File to avoid copyright infringement.]**

**Figure 5 | Experimental verification of single-plane 2-D acoustic hologram.** (a) The  
pre-designed image of a tree. (b) Amplitude and phase profiles on the hologram plane  
for projecting the tree image. (c) The photograph of the 3-D printed LAM sample. (d-  
e) The simulated holographic image by the APM method and the experimentally

103

104

105

106

107



108 measured result. (f) The simulated holographic image by the PM method. (g) The  
109 correlation between the resulting image and the predesigned image at different  
110 frequencies from 13kHz to 20kHz for APM method, and at 17kHz for PM method. (h)  
111 The correlation between the resulting image and the predesigned image when the image  
112 plane locates at different distances. (i) The correlation between the resulting image and  
113 the predesigned image for different back impedances.  
114

**[Editorial Note: This image has been redacted to avoid copyright infringement.]**

**Figure 6 | Experimental verification of multi-plane 3-D acoustic hologram.** (a) The predesigned image of a multi-plane acoustic hologram (Letters “N”, “J”, “U” at different distances of 12cm, 16cm, 20cm). (b) Amplitude and phase profiles on the hologram plane for projecting the “N”, “J”, “U” images at multiple planes. (c) The photograph of the 3-D printed LAM sample. (d-e) The simulated holographic images by the APM method and the corresponding experimentally measured results. The correlations are marked in the figure. The correlation between the resulting image and the predesigned image is appended below each sub-figure.

115  
116  
117  
118  
119  
120  
121  
122  
123  
124

125 2. When it comes to the experimental results, I guess you are using the same frequency  
 126 (17kHz?) in the numerical simulations. However, it is worth to say it clearly to have a  
 127 rough idea on the different parameters, like the size of unit cell, 2 cm wavelength, 20  
 128 wavelength away for the image, etc. There are two aspects that the authors should  
 129 discuss. One on frequency dispersion. Will the design work with a reasonable  
 130 bandwidth? Another is on the error analysis. A more quantitative analysis, e.g. rms  
 131 error, should be done on comparing simulation and experimental results.

132

133 **Response:** In the revised version, we define a parameter of “image correlation” on the  
 134 error analysis for quantitatively evaluating the quality of acoustic hologram. The image  
 135 correlation has been commonly used to measure the degree of similarity between the  
 136 numerical/experimental image and the target one, where the mathematical definition  
 137 can be referred to the Supplementary Note 5. Please refer to

138 **“Note 5. Calculation of the correlation between two images.**

139 The correlation for evaluating the similarity between two images is calculated by

$$140 \text{ Correlation} = \frac{\sum_m \sum_n (A_{mn} - \bar{A})(B_{mn} - \bar{B})}{\sqrt{\left(\sum_m \sum_n (A_{mn} - \bar{A})^2\right)\left(\sum_m \sum_n (B_{mn} - \bar{B})^2\right)}}, \quad (\text{S28})$$

141 where  $A$  and  $B$  are the data matrices of the two images, and  $\bar{A}$  and  $\bar{B}$  are the mean  
 142 values of the elements in the matrices  $A$  and  $B$ , respectively.” on pages 10-11, lines  
 143 136-140 in the supplementary materials. Based on the definition, a unitary correlation  
 144 denotes that the two images are identical, and the holographic image is perfect.

145 By utilizing the parameter of “image correlation”, we quantitatively investigate the  
 146 bandwidth of our design work as well as the robustness of performance against  
 147 distances of holographic image planes. In the revised manuscript, Fig. 5(g) shows the  
 148 relation between “image correlation” and the operation frequency. The results reveal  
 149 that our designed LAM has a relatively broad operation bandwidth, with the best effect  
 150 observed at 17kHz. Since the quasi-DP locates at 17kHz, the image correlation in  
 151 simulation (experiment) reaches maximum of 0.880(0.771). We also note that the

152 holographic image based on APM in a broad frequency range (14kHz~20kHz,  
153 correlation>0.770) is better than the one of the PM method (17kHz, correlation=0.767).  
154 The simulated holographic images at different frequencies based on PM or APM are  
155 appended in the Fig. S4 of supplementary materials. Figure 5(h) plots the image  
156 correlation at different distances of holographic image planes. Clearly, the effect for  
157 APM is better than that of PM, and the correlation slightly decreases with larger  
158 distances due to wave diffraction.

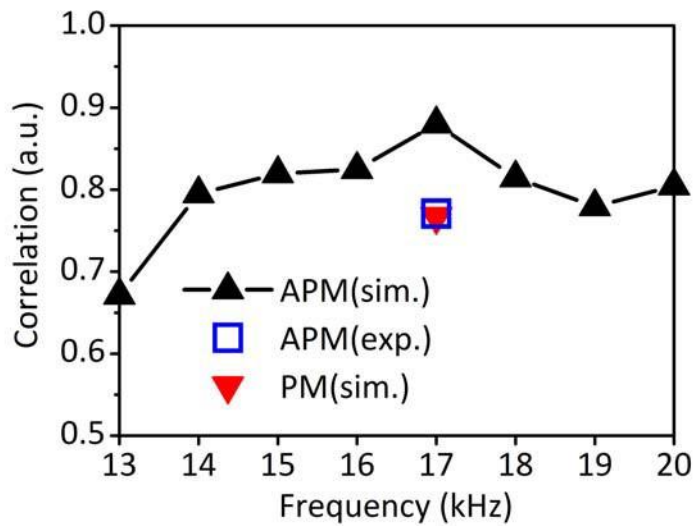

159  
160 Figure 5(g). The correlation between the resulting image and the predesigned image at  
161 different frequencies from 13kHz to 20kHz for APM, and at 17kHz for PM.

162 [Editorial Note: This image has been redacted to avoid copyright infringement.]

163

164 **Figure S4 | The holographic images calculated by the PM or APM method at different frequencies. PM: Phase modulation. APM: Amplitude and phase modulation.**

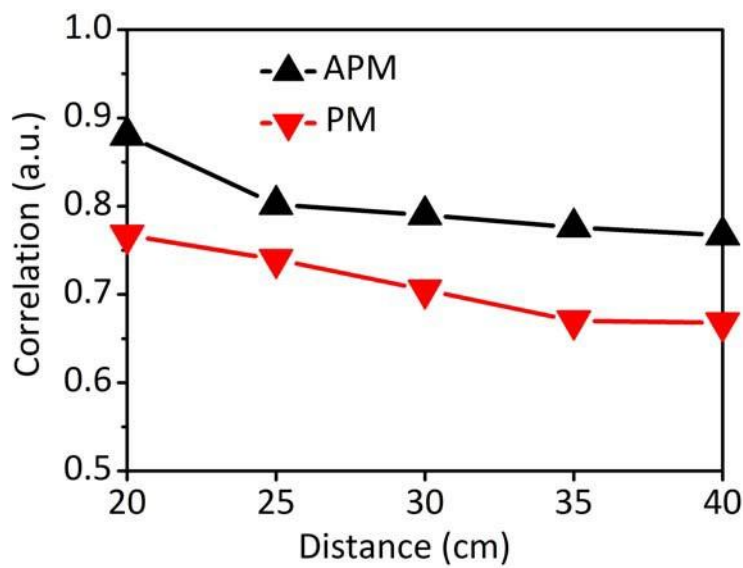

165

166

167 Figure 5(h). The correlation between the resulting image and the predesigned image  
168 when the image plane locates at different distances.

169

170

171 3. For the simulations, how is the hologram and airy beam simulated? with or without  
the structural unit cell? That should be clarified.

172

173 **Response:** Thank you for pointing out this issue. The high-fidelity hologram in Fig. 2  
174 is simulated by the effective parameters (amplitude and phase), since the required  
175 number of pixels (  $359 \times 359$  ) on the hologram plane is huge and our computing cluster  
176 cannot support the full-wavelength simulation of such a large model. Other results in  
177 Figs. 3-6 (the Airy beam, multi-focal focusing, single-plane 2-D hologram as well as  
178 multi-plane 3-D hologram) are simulated with the modeled LAM comprising structural  
179 unit cells. Please refer to Fig. 2 with a revised caption and the remark “As typical  
180 examples, we will further show the production of the Airy beam, multi-focal focusing,  
181 sing-plane 2-D hologram as well as multi-plane 3-D hologram via holey structured  
182 LAM in the following.” on page 11, lines 220-222 in the revised manuscript.

**[Editorial Note: This image has been redacted to avoid copyright infringement.]**

**Figure 2 | High-fidelity acoustic hologram.** (a) Schematic diagram of hologram reconstruction. (b) Schematic diagram of how LAM projects high-quality acoustic hologram in simulation and experiment. (c) The target image of a school badge with

183

184

185

186

187 complex amplitude distributions. (d) The simulated holographic image by the APM  
188 method. (e) The simulated holographic image by the PM method. (f-h) Another case of  
189 projecting a more complicated acoustic hologram with the target image an Einstein's  
190 photo. The simulation is conducted by effective parameters.

191

192 4. Please also clarify in text how the absorbing boundary is realized in experiment. Is  
193 it just an open boundary or some absorbing materials there?

194

195 **Response:** Thank you for pointing out this issue. In the revised manuscript, we point  
196 out that the leaky back of our sample is facing towards the sound-absorbing panels that  
197 are set 2cm away from the sample, the same as the case in the full-wave simulation.  
198 Please refer to “The leaky back of the sample is facing towards the sound-absorbing  
199 panels that are set 2cm away from the sample, the same as the simulation case.” on  
200 **page 17, lines 357-358** in the revised manuscript.

201

202 5. On a whole, I found the manuscript very enjoyable to read, seeing its potential on  
203 applications and suitable for broad readership. I would really like to recommend its  
204 publication after the authors improve on the above issues.

205

206 **Response:** Thank you for your appreciation on our work.

207

208 **Referee #2 (Remarks to the Author):**

209

210 1. *This manuscript describes a means to model acoustic metamaterials (AMM) that*  
211 *permit the independent control of both the magnitude and phase of a reflected signal*  
212 *using simple structured elements. The authors provide a detailed description of the*  
213 *behavior of these elements and the approach to determining the specific geometries that*  
214 *enable arbitrary control of magnitude and phase of the acoustic signal reflected from*  
215 *their surface. The authors state that the primary contribution of their work is the*  
216 *consideration of loss in the elements and demonstration of the ability to provide full*  
217 *control of the reflected field despite this loss. This is indeed a unique contribution in*  
218 *terms of the existing acoustic metamaterial research and is therefore of interest for*  
219 *publication in Nature Communications. However, it is the opinion of this reviewer that*  
220 *several points and ambiguities need to be addressed prior to acceptance. Those points*  
221 *are listed below.*

222

223 **Response:** We thank the referee for the positive remarks and valuable advices. We have  
224 made every effort to revise and improve the manuscript.

225

226 1) *The manuscript considers losses at the back of the metamaterial elements (as*  
227 *described in lines 87-89 of page 5). This approach does indeed take into account the*  
228 *loss in the elements, but it seems too simplistic for the claims that are made in the*  
229 *manuscript. Specifically, the authors claim that their model clearly shows that when*  
230 *losses are present, regardless of losses in the AMM structures. However, the losses*  
231 *considered here are only for the case of a perfectly absorbing boundary at the back of*  
232 *the elements. It is not at all clear what this means for more general losses. The following*  
233 *cases should be discussed and probably analyzed in a revised manuscript if the authors*  
234 *wish to keep the strong statement that this work is in regards to “lossy metamaterials”*  
235 *in general.*

236 a. *What happens if the impedance at the back of the AMM structures is not perfectly*  
237 *absorbing, but instead consists of some complex impedance,  $Z_{\text{back}} = Z_r + jZ_i$ ?*

238 *Can the model consider this case and still achieve the arbitrary control? This must be*  
239 *clearly addressed in the revision. It would be best if results from one case be shown in*  
240 *comparison with the current results.*

241

242 **Response:** Thank you for those important questions and suggestions. To answer the  
243 referee’s question, we first define a parameter of “image correlation” on the error  
244 analysis for evaluating the quality of acoustic hologram. The “image correlation”  
245 measures the degree of similarity between the numerical/experimental image and the  
246 target one, where the mathematical definition can be referred to the Supplementary  
247 Note 5. Please refer to

248 **“Note 5. Calculation of the correlation between two images.**

249 The correlation for evaluating the similarity between two images is calculated by

$$250 \text{Correlation} = \frac{\sum_m \sum_n (A_{mn} - \bar{A})(B_{mn} - \bar{B})}{\sqrt{\left(\sum_m \sum_n (A_{mn} - \bar{A})^2\right)\left(\sum_m \sum_n (B_{mn} - \bar{B})^2\right)}}, \quad (\text{S28})$$

251 where  $A$  and  $B$  are the data matrices of the two images, and  $\bar{A}$  and  $\bar{B}$  are the mean  
252 values of the elements in the matrices  $A$  and  $B$ , respectively.” on pages 10-11, lines  
253 136-140 in the supplementary materials. Based on the definition, a unitary correlation  
254 denotes that the two images are identical, and the holographic image is perfect.

255 By utilizing the parameter of “image correlation”, we quantitatively investigate the  
256 performance of our approach when the back impedance is complex or not perfectly  
257 absorbing. The correlations at different back impedances are shown in Fig. 5(i) in the  
258 revised manuscript.



259 **[Editorial Note: This image has been redacted to avoid copyright infringement.]**  
260 **Figure 5 | Experimental verification of single-plane 2-D acoustic hologram.** (a) The  
261 pre-designed image of a tree. (b) Amplitude and phase profiles on the hologram plane  
262 for projecting the tree image. (c) The photograph of the 3-D printed LAM sample. (d-  
263 e) The simulated holographic image by the APM method and the experimentally  
264 measured result. (f) The simulated holographic image by the PM method. (g) The  
265 correlation between the resulting image and the pre-designed image at different  
266 frequencies from 13kHz to 20kHz for APM method, and at 17kHz for PM method. (h)  
267 The correlation between the resulting image and the pre-designed image when the image  
268 plane locates at different distances. (i) The correlation between the resulting image and  
269 the pre-designed image for different back impedances.

270

271 Note that the simulated holographic images in Figs. 5(d) and 5(f) are corresponding  
272 to the cases at the hollow triangle with back impedance  $410\text{N}\cdot\text{S}/\text{m}^3$  (correlation=0.880)  
273 and at the red triangle (correlation=0.767) in Fig. 5(i), respectively. The results in Fig.  
274 5(i) show that we can still achieve very good holographic images (correlation>0.767)  
275 when the impedance at the back of the LAM structure is not perfectly absorbing. In this

276 case, we can conduct simultaneous (but may not be independent) control of amplitude  
 277 and phase, as unveiled in the added Fig. S5 of supplementary materials. A totally  
 278 independent control of reflection amplitude and phase is achieved at specific back  
 279 impedance as predicted by our theoretical analysis as well as by the numerical results  
 280 corresponding to  $Z=410 \text{ N}\cdot\text{S}/\text{m}^3$ . This simply means a perfect matching of impedance  
 281 and can be conveniently realized in practice by just keeping the back of each unit cell  
 282 open (if there is relatively a large space behind the sample) or by placing a perfect  
 283 absorptive panel near the backside of sample (which is the very way we used in  
 284 experiment and is necessary when the sample needs to be attached to a rigid wall).

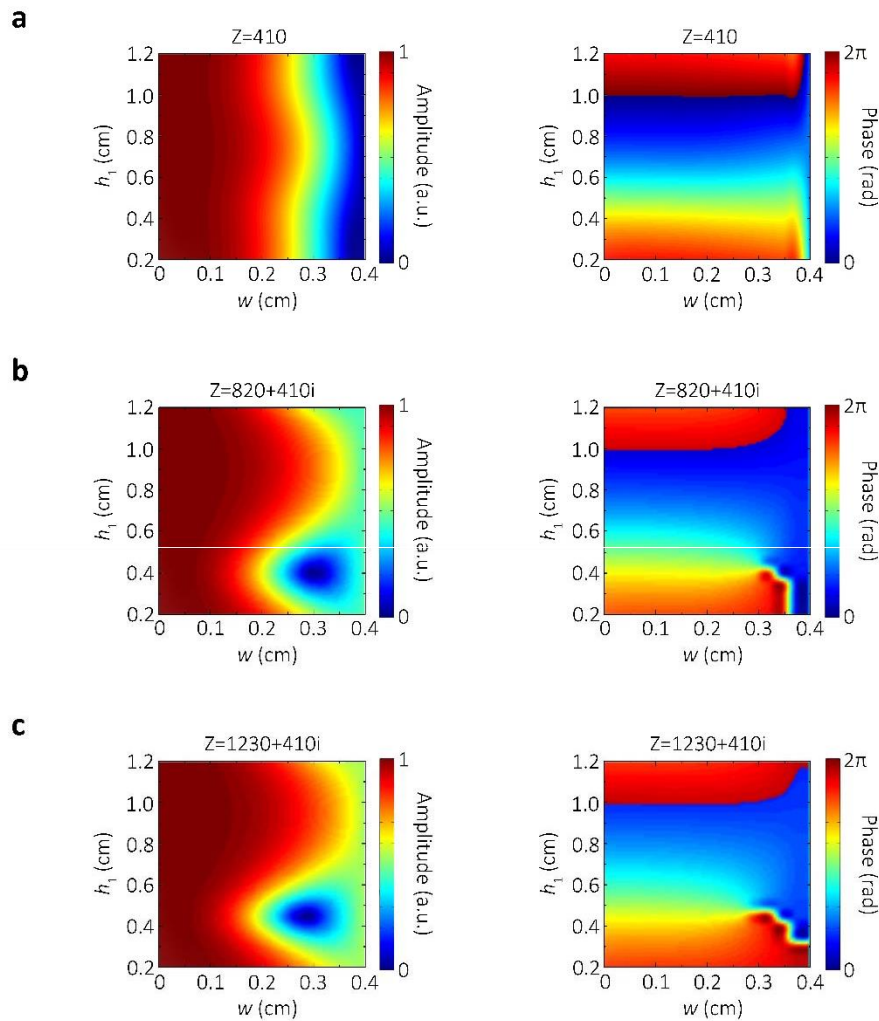

285  
 286 **Figure S5 | The calculated reflection amplitude and phase for different back**  
 287 **impedances. (a)  $Z=410 \text{ N}\cdot\text{S}/\text{m}^3$ , (b)  $Z=820+410i \text{ N}\cdot\text{S}/\text{m}^3$ , (c)  $Z=1230+410i \text{ N}\cdot\text{S}/\text{m}^3$ .**

288

289 b. *More importantly, unless I have missed something, the present manuscript only*  
290 *considers loss at the back boundary, and not losses induced within the elements. Such*  
291 *losses, thermos-viscous in nature, are distributed within the AMM structures. It is not*  
292 *clear that the AMM structure, the design scheme, and the modeling is sufficient to*  
293 *capture these types of losses and whether they are important are not. The authors need*  
294 *to clearly address this point as it is highly relevant to their central points.*

295

296 **Response:** Thank you for this very important point. Following the suggestion of the  
297 referee, we have conducted simulations by incorporating the thermal viscosity within  
298 each unit cell into account and find out that the energy loss due to thermos-viscous  
299 effect is lower than 1%. Our result agrees with the acoustic theory, since the thinnest  
300 channels in our designed structure are still orders of magnitude larger than the thickness  
301 of boundary layer despite the subwavelength scale of the whole unit cell. As a result,  
302 the thermal-viscous effect in LAM structures is trivial and will not appreciably affect  
303 the manipulation of amplitude and phase, which is also verified by the good agreement  
304 between the simulations and measurements. In the revised manuscript, we have added  
305 some discussions on this issue. Please refer to “[It should be pointed out that the energy](#)  
306 [loss due to thermal viscosity in narrow channels is lower than 1% in numerical](#)  
307 [simulations, since the cross section of air channels is still much larger than the thickness](#)  
308 [of boundary layer. Therefore, the thermal-viscous effect in LAM structures is trivial](#)  
309 [and will not appreciably affect the independent manipulation of amplitude and phase,](#)  
310 [which is also verified by the good agreement between the simulations and](#)  
311 [measurements.](#)” on **pages 7-8, lines 152-157.**

312

313 2) *The term “leaky loss” is used throughout the manuscript. What, precisely, is meant*  
314 *by this term in the context of this particular case? Do the authors mean that the AMM*  
315 *leaks energy out the back of the hologram plane? More details need to be provided or*  
316 *a different term should be employed.*

317

318 **Response:** In our work, the term “leaky loss” refers specifically to the energy leaking

319 out the back of the hologram plane, which will not be reflected back due to the matched  
320 impedance that can be realized conveniently in practice by simply leaving the back of  
321 each unit cell open (if there is relatively large space behind the sample) or by placing a  
322 perfect absorptive panel near to the backside of our sample (which is the way we used  
323 in experiment and is useful when the sample needs to be attached to a rigid wall). In the  
324 revised manuscript, we have provided more details on this issue. Please refer to “[The](#)  
325 [leaky back of the sample is facing towards the sound-absorbing panels that are set 2cm](#)  
326 [away from the sample, the same as the simulation case.](#)” on **page 17, lines 357-358.**

327

328 *3) One of the key claims that the authors make is that the independent control of*  
329 *magnitude and phase allows for improved control of the pressure fields. This indeed*  
330 *seems to be the case. However, the authors do not provide any discussion on the*  
331 *resolution limitations of their approach in terms of wavelength. What is the minimum*  
332 *size of the structures at the hologram plane? Does this approach simply allow us to*  
333 *have a higher fidelity control (as evidenced by their results), but not to surpass standard*  
334 *resolution limits? A discussion on these points needs to be provided in the revised*  
335 *manuscript.*

336

337 **Response:** As the referee points out, our method does not surpass standard resolution  
338 limits, which is in theory the only limitation on its performance of sound manipulation.  
339 Hence for our sample, the size of each unit cell at the hologram plane is chosen as  $1/4$   
340 wavelength, which is sufficiently small for avoiding spatial alias and generating smooth  
341 phase and amplitude profiles. This important feature, together with the independent  
342 control of magnitude and phase, enables controlling acoustic waves with a higher  
343 fidelity control, especially when the image plane is not far away from the sample. For  
344 clarification we plot in Fig. 5(h) in the revised manuscript the comparison between the  
345 image correlations as functions of the distances of holographic image planes for APM  
346 and PM. Clearly, the hologram quality for APM is always much better than that of PM  
347 regardless of the distance of image plane, although for both cases the correlation slightly  
348 decreases with larger distances due to wave diffraction, as shown in Fig. 5(h).

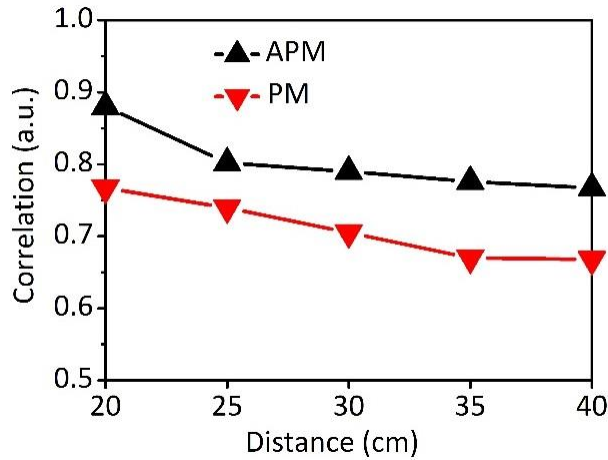

349

350 Figure 5(h). The correlation between the resulting image and the predesigned image  
 351 when the image plane locates at different distances.

352

353 We have also added some discussions on this issue. Please refer to “Figure 5(h)  
 354 illustrates the comparison between the image correlations as functions of the distances  
 355 of holographic image planes for APM and PM methods. Clearly, the hologram quality  
 356 for APM is always much better than that of PM regardless of the distance of image  
 357 plane, although for both cases the correlation slightly decreases with larger distances  
 358 due to wave diffraction, as shown in Fig. 5(h). Moreover, we emphasize simultaneous  
 359 control of reflection amplitude and phase can be achieved even when the back  
 360 absorption is partial (see Supplementary Fig. 5). In this case, we can also project  
 361 holograms with relatively higher correlations to the target image, as unveiled in Fig.  
 362 5(i).” on page 14, lines 305-313.

363

364 4) *Figures 2c and 2d would be more compelling if they included the image  
 365 reconstruction for both amplitude and phase control AMM and just phase controlled  
 366 AMM. The current figure is good, but it lacks an ability to provide a qualitative  
 367 comparison between the two different approaches.*

368

369 **Response:** In light of the referee’s suggestion, we add the hologram results based on  
 370 optimized phase modulation (PM) in Figs. 2(e) and 2(h) for comparison. In addition to  
 371 the quantitative comparison displayed in the new Fig. 5, we have added in the updated

372 version for numerically and experimentally showing the merits enabled by independent  
373 control of phase and amplitude, the results in Fig. 2 provide a qualitative comparison  
374 between the two different approaches and clearly give a visual demonstration of how  
375 the proposed APM method outperforms the PM method. It is apparent that the  
376 generation of holographic images with great complexity is really challenging for  
377 optimized PM yet can be achieved with high fidelity by our APM, which however, is  
378 difficult to realize experimentally within a limited time.

**[Editorial Note: This image has been redacted to avoid copyright infringement.]**

**Figure 2 | High-fidelity acoustic hologram.** (a) Schematic diagram of hologram reconstruction. (b) Schematic diagram of how LAM projects high-quality acoustic hologram in simulation and experiment. (c) The target image of a school badge with complex amplitude distributions. (d) The simulated holographic image by the APM method. (e) The simulated holographic image by the PM method. (f-h) Another case of projecting a more complicated acoustic hologram with the target image an Einstein's photo. The simulation is conducted by effective parameters.

379

380

381

382

383

384

385

386

387

388 In addition, we add some discussions on a qualitative comparison between the two  
389 different approaches in the revised manuscript. Please refer to “Here, we append the  
390 holographic image simulated by PM optimization of Gerchberg-Saxton (GS) algorithm  
391 in Fig. 2(e). Comparing Figs. 2(d) and 2(e), our method clearly outperforms the PM  
392 method, providing a great flexibility in hologram reconstruction. The second target  
393 image is an Einstein's photo with different gray values, where the amplitudes at image  
394 pixels are continuously varied between 0 and 1, as shown in Fig. 2(f). The holographic  
395 image in Fig. 2(g) based on APM is consistent with the target image, while the  
396 holographic image based on PM is very blurred, as shown in Fig. 2(h).” on **pages 10,**  
397 **lines 207-214** in the revised manuscript.

398

399 *5) Finally, it is not clear from this work why including loss at the back of the structure*  
400 *is necessary to get independent control of amplitude and phase. Is this truly necessary?*  
401 *Can it be done without losses being present? Please provide a discussion of this in the*  
402 *revision.*

403

404 **Response:** When manipulating the reflected acoustic waves, the reflection amplitude  
405 would always be unity in the absence of energy loss. The presence of loss effect is  
406 therefore necessary for the production of non-unitary magnitude but does not guarantee  
407 better performance of acoustic manipulation due to the ubiquitous coupling between  
408 the amplitude and phase variation. The essence of our current work lies in that we have  
409 proved both theoretically and experimentally that leaking loss effect, if engineered  
410 properly by using specific geometries, could lead to independent and arbitrary control  
411 of amplitude and phase, enabling high-fidelity manipulation of acoustic waves. In the  
412 revised version, following the suggestion of the referee, we have added new results for  
413 investigating how the quality of acoustic manipulation by the proposed APM depends  
414 on the back impedance and provided some discussions on this issue. The added results  
415 quantitatively prove that the introduction of loss effect in our proposed metastructure  
416 enables simultaneous control over the amplitude and phase and helps to improve its

417 wavefront-steering capability, while a totally-independent amplitude and phase control  
418 for producing the best effect needs to be achieved when the leaky loss at the back is  
419 perfect. In the revised manuscript, we have provided some discussions on this issue.  
420 Please refer to “The unit cells are capable to modulate both amplitude and phase of  
421 reflection at the surface under the illumination of sound on the front side, as indicated  
422 by the red arrows in Fig. 1(a), where the loss at the back side is required to get control  
423 of reflection amplitude. Here we would like to mention that the reflection amplitude  
424 would always be unitary in the absence of energy loss when manipulating the reflected  
425 acoustic waves. The presence of loss effect is therefore necessary for the production of  
426 non-unitary magnitude but does not guarantee better performance of acoustic  
427 manipulation due to the ubiquitous coupling between the amplitude and phase variation.  
428 The essence of this work lies in that the leaking loss effect, if engineered properly by  
429 using specific geometries, could lead to independent and arbitrary control of reflection  
430 amplitude and phase, enabling high-fidelity manipulation of acoustic waves.” on **pages**  
431 **4-5, lines 86-97** in the revised manuscript.

432

433 Minor points to address:

434 1) *The first sentence in the abstract should be re-written. It's seems a bit too grandiose*  
435 *for a scientific publication*

436

437 **Response:** We have rewritten the first sentence in the abstract. Please refer to “**Fine**  
438 **manipulation of sound field in 3-D space is an important issue in acoustics but hitherto**  
439 **is restricted by the coupled amplitude and phase modulations in existing wave-steering**  
440 **metamaterials.**” on **page 2, lines 24-26** in the revised manuscript.

441

442 2) *Similarly, the use of the term “hyperfine” in the title seems a bit too strong of a*  
443 *statement. It would seem that the term ‘fine’ would be better.*

444

445 **Response:** We have made a careful check throughout the manuscript and changed the  
446 term “**hyperfine**” into “**fine**” throughout the manuscript based on the suggestion.



447

448 3) Why did the authors define the coupling strengths in Eq. (1) in terms of both  
449 geometric variables rather than defining four strengths like  $M_{\{A,h\}} = (\partial A / \partial h)$ ,  
450  $M_{\{A,w\}} = (\partial A / \partial w)$ , ...? As they are currently defined,  
451 the coupling strength can be zero if it has no dependence on either variable, but gives  
452 no information on the dependence of  $h$  and  $w$  independently? The current definition  
453 seems to work for the design, but it seems to hide information. It would be best if the  
454 authors could provide a comment on this point in the manuscript when those parameters  
455 are introduced.

456

457 **Response:** In the revised manuscript, we have defined four coupling strengths in Eq.  
458 (1) in light of the referee's suggestion, as follows

459 
$$M_{A,h_1} = \frac{\partial A}{\partial h_1}, M_{A,w} = \frac{\partial A}{\partial w}, M_{\phi,h_1} = \frac{\partial \phi}{\partial h_1}, M_{\phi,w} = \frac{\partial \phi}{\partial w}, \quad (1)$$

460 We further obtain the coupling coefficients  $\overline{M}_{A(\phi),h_1(w)}$  by integrating the coupling  
461 strengths for all combinations of  $(h_1, w)$  and conducting normalization with respect to  
462 their maxima (See Note 4 in the revised supplementary materials). As aforementioned,  
463 a completely decoupled manipulation of reflection amplitude and phase means that the  
464 amplitude and phase of reflection should be related to only one structural parameter ( $h_1$   
465 or  $w$ ). To search for the condition of decoupled manipulation of reflection amplitude  
466 and phase, we further calculate the coupling coefficients  $\overline{M}_{A(\phi),h_1(w)}$  in the parameter  
467 space  $(h, \beta)$ , as shown in the revised Fig. 1(b). From the figure, we clearly find the  
468 existence of decoupled points (DPs) (*viz.*,  $\overline{M}_{A,h_1} = 0$  and  $\overline{M}_{\phi,w} = 0$ ) as well as quasi-  
469 DPs (*viz.*,  $\overline{M}_{A,h_1} \approx 0$  and  $\overline{M}_{\phi,w} \approx 0$ ), where  $A$  can be regarded as being only related to  
470  $w$ , and  $\phi$  only related to  $h_1$ .

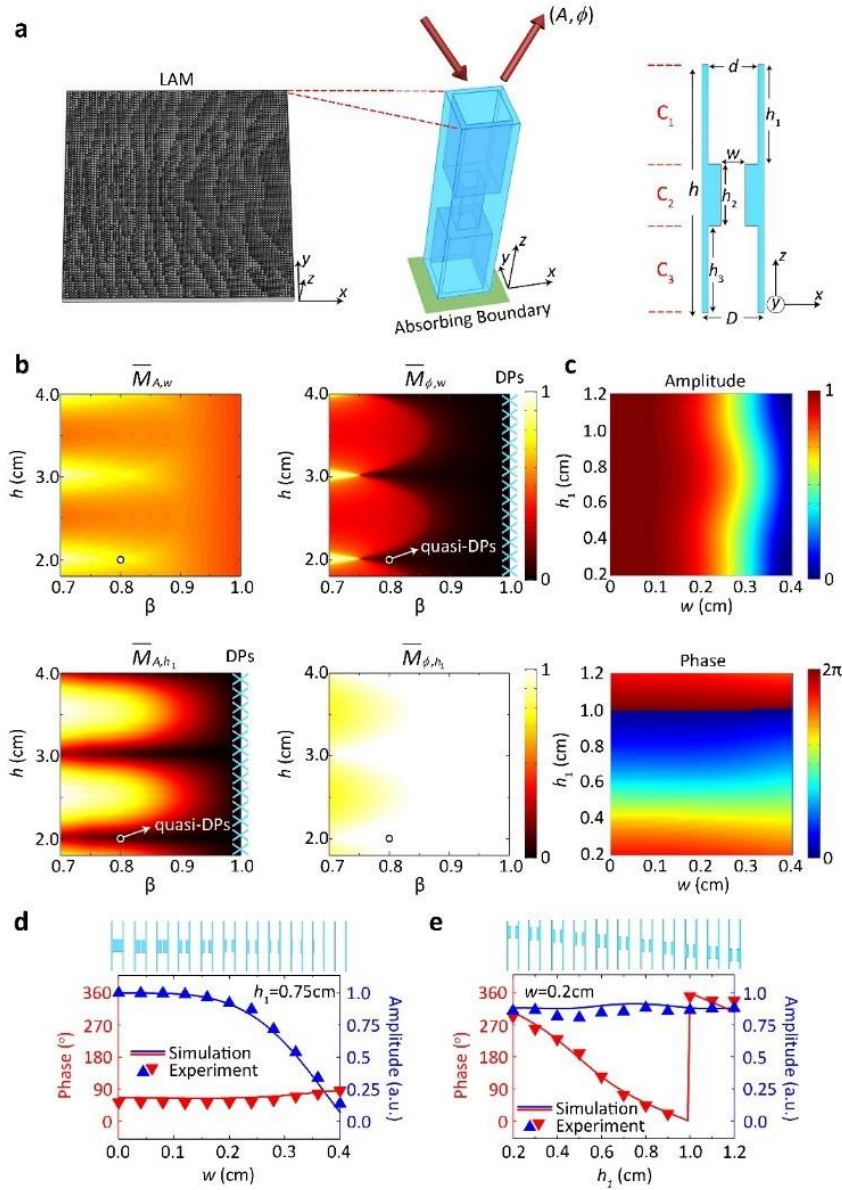

471

472 **Figure 1 | Decoupled modulation of reflection amplitude and phase.** (a) Schematic

473 diagram of holey metamaterials with an absorbing boundary at the back side, *viz.*, LAM.

474 3-D illustration and 2-D cross-section view of a unit cell are appended. (b) The coupling

475 coefficients  $\overline{M}_{A(\phi),h_1(w)}$  versus  $h$  and  $\beta$  with DPs and quasi-DPs marked by the

476 crosses and arrows, respectively. (c) The reflection amplitude and phase responses to

477 parameters  $h_1$  and  $w$  for a unit cell operating at quasi-DPs. (d-e) The simulated and

478 measured amplitude and phase versus  $w$  and  $h_1$ , respectively, which reveals that the

479 reflection amplitude and phase are controlled by only one parameter, respectively.

480 For the revisions, please refer to **pages 5-6, lines 107-129** in the revised manuscript.

481

482 4) *Line 126 of page 7 has a discussion about the case where  $\beta = 1$  and the fact that*  
483 *it cannot be hit in reality because of the finite impedance contrast between air and*  
484 *elastic solids. Isn't the  $\beta = 1$  case where portions of the AMM structure is purely*  
485 *air? The impedance contrast doesn't seem relevant.*

486

487 **Response:** We are sorry for not stating this issue clearly in the original version. Yes, the  
488 condition  $\beta = 1$  corresponds to the case where the channel wall is infinitely thin yet is  
489 able to serve as a rigid boundary for providing total reflection to sound, and the LAM  
490 structure, as indicated by the referee, is mathematically transformed into a trivial  
491 structure of purely air. However, very thin channel walls are unavoidably flexible and  
492 cannot be acoustically regarded as rigid unless they are made of solid with an infinitely  
493 large acoustic impedance. This is physically unsound, since any practical solid must  
494 have a finite rigidity and mass density, and we therefore think that the case of  $\beta = 1$   
495 could not be hit in reality and should be excluded.

496 In the revised manuscript, we have changed our expression on this point as  
497 suggested by the referee. Please refer to “[However, we cannot physically hit them due](#)  
498 [to the fact that very thin channel walls are flexible and no longer provide a rigid](#)  
499 [boundary \(note that the rigidity of channel walls is the prerequisite condition of all our](#)  
500 [derivations\), and mathematically the whole LAM is transformed into a trivial structure](#)  
501 [of purely air at  \$\beta = 1\$ .](#)” on **pages 6-7, lines 130-133.**

502

503 5) *Aren't the patterns shown in Fig 1b Fabry-Perot types of resonances? Please address*  
504 *in the revision.*

505

506 **Response:** Yes, the quasi-decoupling condition corresponds to the occurrence of Fabry-  
507 Pérot resonances. In the revised manuscript, we add a comment on that. Please refer to  
508 “[Apparently, the quasi-decoupling condition corresponds to the occurrence of Fabry-](#)  
509 [Pérot resonances.](#)” on **page 7, lines 141-142.**

510 **Referee #3 (Remarks to the Author):**

511

512 *The paper “Hyperfine manipulation of sound via lossy acoustic metamaterials” by Zhu,*  
513 *Hu, Fan, Yang, Liang, Zhu, and Cheng reports the manipulation of both the amplitude*  
514 *and phase across the wavefront of an acoustic wave incident on a planar metamaterial*  
515 *made of discrete sub-wavelength elements. The key feature reported is the introduction*  
516 *of a loss (amplitude change) via controlled leaky emission from the backside of each*  
517 *element. The authors successfully determine the requirements for independently setting*  
518 *the complex amplitude and phase at each element, which leads to the demonstration of*  
519 *holograms that can now encode both amplitude and phase. This is in principal an*  
520 *interesting piece of work and an advance in the field of acoustics, as it suggests*  
521 *improvements in the generation of sound fields. However, these improvements are*  
522 *mainly shown in simulations and do not manifest themselves in the actual experiments.*  
523 *Important information is missing and the claimed universal improvements are not*  
524 *demonstrated. Therefore further work is needed and the authors are asked to address*  
525 *the following points:*

526

527 **Response:** We thank the referee for the positive remarks and valuable advices. We have  
528 made every effort to revise and improve the manuscript and added the important  
529 missing information proposed by the referee.

530

531 1) *Title: „hyperfine“ has a special meaning in physics. How does it relate to this work?*  
532 *The authors probably mean high fidelity. However, the title should be changed.*  
533 *Independent control of the static amplitude and phase across an acoustic wavefront is*  
534 *the essence of this work and this should be reflected in the title.*

535

536 **Response:** Thank you for pointing out those problems. We have made a careful check  
537 throughout the manuscript and changed the term “[hyperfine](#)” into “[fine](#)” based on the  
538 suggestion. In addition, we have changed the title into “[Fine manipulation of sound via](#)  
539 [lossy acoustic metamaterials with independently and arbitrarily distributed reflection](#)”

540 amplitude and phase”.

541

542 2) *The approach the authors present is limited to reflection. The scalability, especially*  
543 *miniaturization, is limited by two factors, (a) the fabrication method and (b) the*  
544 *requirement of full absorption (or the disappearance) of transmitted wave components*  
545 *at the backside. Considering these limitations the results are not “universal” and are*  
546 *not as spectacular as the authors claim. The text should be changed accordingly.*

547

548 **Response:** Thank you for this valuable suggestion. In the revised manuscript, we have  
549 discussed those limitations laid on our approach and changed the text accordingly as  
550 suggested by the referee. For example, our approach can basically be extended into  
551 projecting high-fidelity holograms in Fig. 2 as long as the number of unit cells is  
552 sufficiently large for APM design. However, due to the size limitations in 3D-printing,  
553 the pixel number on the hologram plane (119×119) in our experiment is much less than  
554 the numerical investigations in Fig. 2 (359×359). We also discuss the case where the  
555 back absorption is partial. To explore the device performance at partial backside  
556 absorption, we first define a parameter of “image correlation” on the error analysis for  
557 evaluating the quality of acoustic hologram. The “image correlation” measures the  
558 degree of similarity between the numerical/experimental image and the target one,  
559 where the mathematical definition can be referred to the Supplementary Note 5. Please  
560 refer to

561 **“Note 5. Calculation of the correlation between two images.**

562 The correlation for evaluating the similarity between two images is calculated by

$$563 \text{Correlation} = \frac{\sum_m \sum_n (A_{mn} - \bar{A})(B_{mn} - \bar{B})}{\sqrt{\left(\sum_m \sum_n (A_{mn} - \bar{A})^2\right)\left(\sum_m \sum_n (B_{mn} - \bar{B})^2\right)}}, \quad (\text{S28})$$

564 where  $A$  and  $B$  are the data matrices of the two images, and  $\bar{A}$  and  $\bar{B}$  are the mean  
565 values of the elements in the matrices  $A$  and  $B$ , respectively.” on pages 10-11, lines  
566 136-140 in the supplementary materials. Based on the definition, a unitary correlation

567 denotes that the two images are identical, and the holographic image is perfect.

568 By utilizing the parameter of “image correlation”, we quantitatively investigate  
569 performance of our approach when the back impedance is complex or not perfectly  
570 absorbing. The correlations at different back impedances are shown in Fig. 5(i) in the  
571 revised manuscript.

**[Editorial Note: This image has been redacted to avoid copyright infringement.]**

572

573 **Figure 5 | Experimental verification of single-plane 2-D acoustic hologram.** (a) The  
574 pre-designed image of a tree. (b) Amplitude and phase profiles on the hologram plane  
575 for projecting the tree image. (c) The photograph of the 3-D printed LAM sample. (d-  
576 e) The simulated holographic image by the APM method and the experimentally  
577 measured result. (f) The simulated holographic image by the PM method. (g) The  
578 correlation between the resulting image and the pre-designed image at different  
579 frequencies from 13kHz to 20kHz for APM method, and at 17kHz for PM method. (h)  
580 The correlation between the resulting image and the pre-designed image when the image  
581 plane locates at different distances. (i) The correlation between the resulting image and  
582 the pre-designed image for different back impedances.

583

584 Note that the simulated holographic images in Figs. 5(d) and 5(f) are corresponding  
 585 to the cases at the hollow triangle with back impedance  $410\text{N}\cdot\text{S}/\text{m}^3$  (correlation=0.880)  
 586 and at the red triangle (correlation=0.767) in Fig. 5(i), respectively. The results in Fig.  
 587 5(i) show that we can still achieve very good holographic images (correlation>0.767)  
 588 when the impedance at the back of the LAM structure is not perfectly absorbing. In this  
 589 case, we can conduct simultaneous (but may not be independent) control of amplitude  
 590 and phase, as unveiled in the added Fig. S5 of supplementary materials.

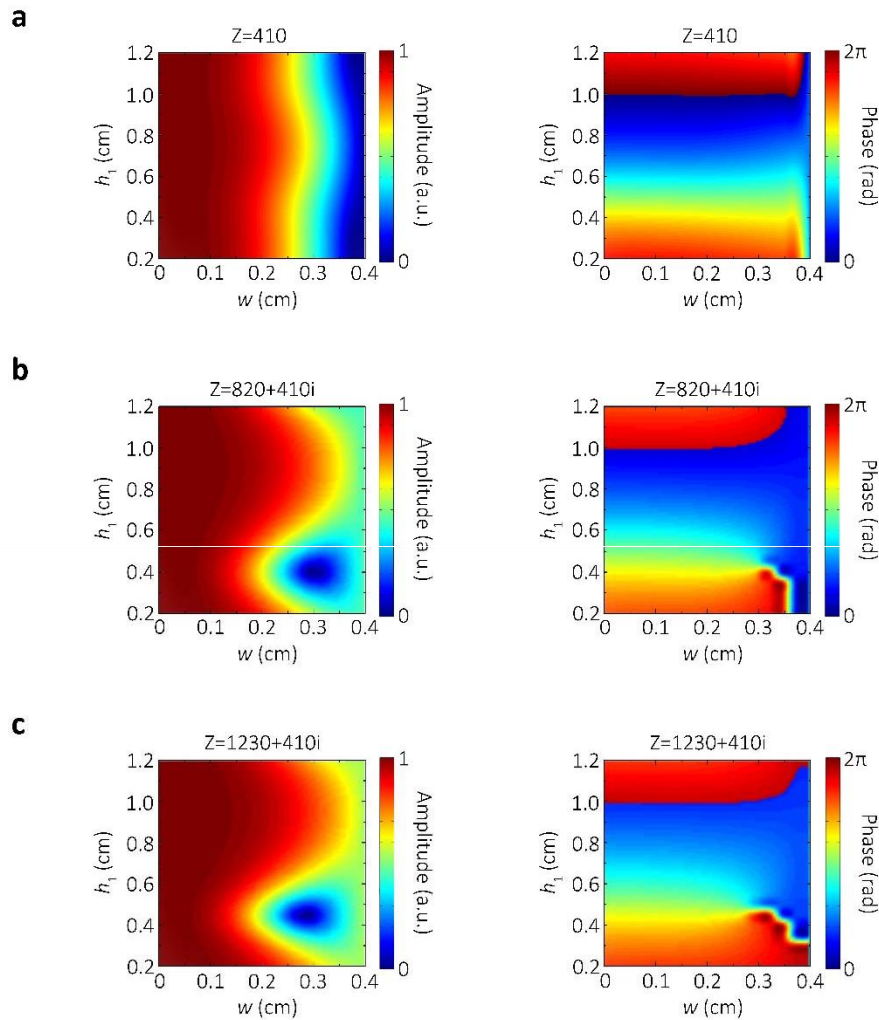

591 **Figure S5 | The calculated reflection amplitude and phase for different back**  
 592 **impedances. (a)  $Z=410\text{N}\cdot\text{S}/\text{m}^3$ , (b)  $Z=820+410i\text{N}\cdot\text{S}/\text{m}^3$ , (c)  $Z=1230+410i\text{N}\cdot\text{S}/\text{m}^3$ .**  
 593

594

595

596 3) *The work mainly shows via simulations that the control of amplitude and phase*

607 *improves holograms. This is well known from optics. The paper does not appear to*  
608 *demonstrate any (real) improvement in the experimental acoustic fields. A convincing*  
609 *experimental demonstration is missing and should be provided by the authors so that*  
600 *the importance of the work can be judged.*

601

602 **Response:** Thank you for pointing out this issue. In light of reviewer's important  
603 suggestion, we have fabricated new samples of  $119 \times 119$  unit cells and conducted  
604 experiments on projecting a single-plane 2-D hologram of finer resolution in Fig. 5, and  
605 multi-plane 3-D hologram in Fig. 6. Please refer to the added section on **pages 13-15**  
606 in the revised manuscript, where we discuss the experimental verification of fine 2-D  
607 hologram and multi-plane hologram in details.

608

609 **Experimental verification of single-plane 2-D hologram and multi-plane 3-D**  
610 **hologram.** In this section, we choose a tree image [Fig. 5(a)] as our target object,  
611 comprising  $200 \times 200$  image pixels. Figure 5(b) presents the reflection amplitude and  
612 phase profiles on the hologram plane for projecting the tree pattern in the far field. The  
613 calculations of amplitude and phase profiles are based on Eq. (3). In the experiment, we  
614 fabricated LAM samples via 3-D printing with precision of 0.1mm. The experiments  
615 were carried out in an anechoic chamber to demonstrate the acoustic hologram  
616 projection. We record both amplitude and phase information into the LAM sample,  
617 where the sample size is  $60 \times 60 \times 2 \text{ cm}^3$  with  $119 \times 119$  unit cells, as shown by the photo  
618 in Fig. 5(c). The size of image area is  $60 \times 60 \text{ cm}^3$ , with a distance 20cm away from the  
619 surface of LAM. Other experimental details can be found in the Methods part. Due to  
620 the size limitations in 3-D printing, the pixel number of the target image in our  
621 experiment is less than the numerical investigations in Fig. 2.

622 We plot the simulated and measured intensity distributions on the image plane in  
623 Figs. 5(d) and 5(e), respectively, showing a good agreement between numerical and  
624 experimental results of fine 2-D hologram. Figure 5(f) shows the simulated result based  
625 on the PM method for comparison. For a quantitative evaluation of the quality of  
626 acoustic hologram, we introduce the parameter of "image correlation" which has been



627 commonly used for measuring the similarity between the numerical/experimental  
628 image and the target one. The calculation of correlation can be referred to the  
629 Supplementary Note 5. A higher value of correlation denotes a better similarity between  
630 the generated holographic image and the target image, and only when the two images  
631 are completely identical can a unitary correlation be achieved, which represents a  
632 perfect hologram. Figure 5(g) shows the relation between image correlation and the  
633 operation frequency. The results reveal that although our LAM is designed to work at  
634 17kHz, it has a relatively broad operation bandwidth, thanks to the low dispersion of  
635 the groove structure [33]. At 17kHz where the quasi-decoupled point (quasi-DP) locates,  
636 the image correlation reaches a maximum of 0.880 in simulation, and the corresponding  
637 measured data, albeit much lower than the simulated one due to the unavoidable  
638 experimental error, still reaches 0.771 and is higher than the ideal value one can achieve  
639 with PM method. We also note that the holographic image based on APM in a broad  
640 frequency range (14kHz~20kHz, correlation>0.770) is better than the one of the PM  
641 method (17kHz, correlation=0.767). The simulated holographic images at different  
642 frequencies based on PM or APM are appended in the Supplementary Fig. 4. Notice  
643 that our proposed method does not surpass standard resolution limits, which is in theory  
644 the only limitation on its performance of sound manipulation. Hence the size of each  
645 unit cell at the hologram plane is chosen as 1/4 wavelength, which is sufficiently small  
646 for avoiding spatial alias and generating smooth phase and amplitude profiles. This  
647 important feature, together with the independent control of magnitude and phase,  
648 enables controlling acoustic waves with a higher fidelity control, especially when the  
649 image plane is not far away from the sample. Figure 5(h) illustrates the comparison  
650 between the image correlations as functions of the distances of holographic image  
651 planes for APM and PM methods. Clearly, the hologram quality for APM is always  
652 much better than that of PM regardless of the distance of image plane, although for both  
653 cases the correlation slightly decreases with larger distances due to wave diffraction, as  
654 shown in Fig. 5(h). Moreover, we emphasize simultaneous control of reflection  
655 amplitude and phase can be achieved even when the back absorption is partial (see  
656 Supplementary Fig. 5). In this case, we can also project holograms with relatively

657 higher correlations to the target image, as unveiled in Fig. 5(i).

658 At last, we demonstrated both numerically and experimentally the production of  
659 precise distribution of acoustic energy in 3-D space. Here we choose to project the  
660 acoustic hologram onto multiple planes instead of a single 2-D plane, as schematically  
661 depicted at Fig. 6(a), where the holographic image is designed to be three hollow letters  
662 “N”, “J”, and “U” at three different planes that are spacing 12cm, 16cm, 20cm away  
663 from the hologram plane. The size of holographic regions at image planes 1, 2 and 3 is  
664  $60\times 60\text{cm}^3$ , and the bottom left corners of those holographic regions locate at (0cm,  
665 30cm), (10cm, 0cm) and (30cm, 20cm) in the  $x$ - $y$  plane. We record amplitude and phase  
666 distributions [Fig. 6(b)] into the LAM sample of  $119\times 119$  unit cells [Fig. 6(c)]. By  
667 comparing the amplitude field patterns in simulations and experiments, we  
668 unambiguously observe a very good agreement. To be specific, the image correlations  
669 to the perfect cases of letters “N”, “J”, “U” are 0.827(0.705), 0.867(0.771), 0.858(0.776)  
670 for the results of simulations(experiments), respectively.

671

**[Editorial Note: This image has been redacted to avoid copyright infringement.]**

672

673

674 **Figure 5 | Experimental verification of single-plane 2-D acoustic hologram.** (a) The  
675 pre-designed image of a tree. (b) Amplitude and phase profiles on the hologram plane  
676 for projecting the tree image. (c) The photograph of the 3-D printed LAM sample. (d-  
677 e) The simulated holographic image by the APM method and the experimentally  
678 measured result. (f) The simulated holographic image by the PM method. (g) The  
679 correlation between the resulting image and the pre-designed image at different  
680 frequencies from 13kHz to 20kHz for APM method, and at 17kHz for PM method. (h)  
681 The correlation between the resulting image and the pre-designed image when the image  
682 plane locates at different distances. (i) The correlation between the resulting image and  
683 the pre-designed image for different back impedances.  
684

**[Editorial Note: This image has been redacted to avoid copyright infringement.]**

**Figure 6 | Experimental verification of multi-plane 3-D acoustic hologram.** (a) The  
pre-designed image of a multi-plane acoustic hologram (Letters “N”, “J”, “U” at  
different distances of 12cm, 16cm, 20cm). (b) Amplitude and phase profiles on the  
hologram plane for projecting the “N”, “J”, “U” images at multiple planes. (c) The  
photograph of the 3-D printed LAM sample. (d-e) The simulated holographic images

685  
686  
687  
688  
689  
690

691 by the APM method and the corresponding experimentally measured results. The  
692 correlations are marked in the figure. The correlation between the resulting image and  
693 the predesigned image is appended below each sub-figure.

694

695 4) *Please, add scale bars or coordinate axes. This applies to almost all images and*  
696 *plots.*

697

698 **Response:** Based on the referee's suggestion, we have added the scale bars on the  
699 images and plots throughout the manuscript.

700

701 5) *How are the phase-only results (PM) obtained, against which the APM are compared?*  
702 *Do you use an optimization procedure or simply keep the phase of the APM and reset*  
703 *all amplitudes to 1? How does this compare to optimized PM of other published works?*  
704 *This information must be provided.*

705 **Response:** Thank you for your questions and suggestions on this important issue. We  
706 are sorry for not clarifying the details of the phase-only results shown in the original  
707 version. In our work, we use an optimization procedure that is based on the Gerchberg-  
708 Saxton (GS) algorithm commonly employed for producing pure-phase holograms in  
709 other published works [see, e.g., Refs. 28-30]. In the revised manuscript, we have added  
710 some discussions on this issue for clarification.

711

712 6) *It is not clear what "Freewheeling" means (abstract).*

713

714 **Response:** In the revised manuscript, we have changed the term "Freewheeling" into  
715 "Fine". Please refer to **Page 2, line 24** in the revised manuscript.

716

717 7) *p.6, Equation 1: capital M is used for both coupling strengths and transfer matrices*  
718 *in the SI. This is an unnecessary source of confusion and the nomenclature should be*  
719 *changed.*

720

721 **Response:** In the revised supplementary materials, we have changed the capital “M”  
 722 into capital “Q” to denote transfer matrices.

723

724 8) p.6, L.116: What does  $(M_A) \overline{((M_\Phi)^{-1})} = 0$  mean? Is it  $(M_A)^{-1} = (M_\Phi)^{-1} = 0$ ?

725

726 **Response:** Yes. To avoid possible misleading, we have changed “ $(M_A) \overline{((M_\Phi)^{-1})} = 0$ ”

727 into “ $\overline{M}_{A,h_1} = 0$  and  $\overline{M}_{\phi,w} = 0$ , respectively.” Please refer to the revision on **Page 6**,

728 **line 128** in the revised manuscript.

729

730 9) p.7, L.138: Do you mean Supplementary Note 3 or 4? Regarding Supp. Note 4, why

731 do you integrate  $w$  over  $[0, 0.4]$  and  $h$  over  $[0.2, 1.2]$ ? One would expect the ranges  $[0,$

732  $\beta D]$  and  $[0, \lambda/2]$ , respectively.

733

734 **Response:** We thank the referee for pointing out this problem. Yes, for the integration,

735 the unit for the ranges is cm and the ranges are in fact  $[0, \beta D]$  and  $[0.1\lambda, 0.6\lambda]$ ,

736 respectively. We have fixed them in the revised version. Please refer to

737 “The coupling coefficients  $\overline{M}_{A(\phi),h_1(w)}$  in the manuscript are calculated by

$$738 \quad \overline{M}_{A(\phi),h_1(w)} = \overline{M}_{A(\phi),h_1(w)}(\beta, h) / \max[\overline{M}_{A(\phi),h_1(w)}(\beta, h)], \quad (\text{S26})$$

739 where

$$740 \quad \begin{aligned} \overline{M}_{A,h_1}(\beta, h) &= \int_0^{\beta D} \int_{0.1\lambda}^{0.6\lambda} M_{A,h_1} dw dh_1 = \int_0^{\beta D} \int_{0.1\lambda}^{0.6\lambda} \frac{\partial A}{\partial h_1} dw dh_1, \\ \overline{M}_{A,w}(\beta, h) &= \int_0^{\beta D} \int_{0.1\lambda}^{0.6\lambda} M_{A,w} dw dh_1 = \int_0^{\beta D} \int_{0.1\lambda}^{0.6\lambda} \frac{\partial A}{\partial w} dw dh_1, \\ \overline{M}_{\phi,h_1}(\beta, h) &= \int_0^{\beta D} \int_{0.1\lambda}^{0.6\lambda} M_{\phi,h_1} dw dh_1 = \int_0^{\beta D} \int_{0.1\lambda}^{0.6\lambda} \frac{\partial \phi}{\partial h_1} dw dh_1, \\ \overline{M}_{\phi,w}(\beta, h) &= \int_0^{\beta D} \int_{0.1\lambda}^{0.6\lambda} M_{\phi,w} dw dh_1 = \int_0^{\beta D} \int_{0.1\lambda}^{0.6\lambda} \frac{\partial \phi}{\partial w} dw dh_1, \end{aligned} \quad (\text{S27})$$

741 on **Page 10, lines 130-133** in the supplementary materials.

742

743 10) On p.8 the authors write that “However, due to the lack of capability to modulate

744 both amplitude and phase, the current production of acoustic holograms ...cannot

745 *guarantee high-fidelity of images“. This does not seem to be correct as phase-only*  
746 *holograms have been shown to generate extremely high-fidelity images?*

747

748 **Response:** Thank you for pointing out that. We have rewritten this paragraph. Please  
749 refer to “[However, due to the lack of capability to modulate both amplitude and phase,](#)  
750 [the current production of acoustic hologram has to rely on phase-modulation \(PM\)](#)  
751 [approaches combined with complex optimization process<sup>24-30</sup>.](#)” on **Page 8, lines 165-**  
752 **167** in the revised manuscript.

753

754 11) *p. 10, L.192ff: Please choose a number of unit cells that allows comparison to either*  
755 *your experimental data or previously published hologram data. The images in Figure*  
756 *2 are phenomenal but so is the element count of 359x359. The experimental data*  
757 *presented in Figure 5 look mediocre compared to what has been achieved with pure*  
758 *phase holograms in other works.*

759

760 **Response:** We thank the referee for the important suggestion. In light of the referee’s  
761 suggestion, we have further increased the number of unit cells (albeit still much less  
762 than the images shown in Fig. 2 due to the limitation on the size of our 3-D printing  
763 machine) and added the experimental demonstration of projection of a 2-D image with  
764 finer resolution as well as production of fine distribution of acoustic energy in 3-D space.  
765 The renewed experimental results are shown in the updated Figs. 5 and 6 in the revised  
766 manuscript, and some discussions have also been added on the comparison between our  
767 proposed APM and PM methods. More details of this part can be referred to our reply  
768 to question 3. Also, we have updated Fig. 2 by adding the results from optimized PM  
769 and shown their comparisons to the results from APM method, which clearly verifies  
770 the capability of our proposed scheme to generate very sophisticated acoustic  
771 holograms with high fidelity that are challenging for PM.

772 In addition, we have provided a direct comparison to previously published hologram  
773 data as suggested by the referee. Here we choose to use the proposed APM method to  
774 produce the same holographic image as in Ref. 28 (Nature 537, 518–522 (2016)) and

775 show the results in Fig. R1. From Figs. R1(b) and (c), we can unambiguously see that  
776 the quality of acoustic hologram generated by our APM method substantially  
777 outperforms the result from PM employed in Ref. 28 (in the current stage an  
778 experimental comparison is not technically feasible for us since the hologram in Ref.  
779 28 was generated for ultrasound in water).

780 For the revision in the manuscript, please refer to “Here, we append the holographic  
781 image simulated by PM optimization of Gerchberg-Saxton (GS) algorithm in Fig. 2(e).  
782 Comparing Figs. 2(d) and 2(e), our method clearly outperforms the PM method,  
783 providing a great flexibility in hologram reconstruction. The second target image is an  
784 Einstein's photo with different gray values, where the amplitude at image pixels  $A_{0l}$  is  
785 continuously changed between 0 and 1, as shown in Fig. 2(f). The holographic image  
786 in Fig. 2(g) based on APM is consistent with the target image, while the holographic  
787 image based on PM is very blurred, as shown in Fig. 2(h).” on **page 10, lines 207-214**  
788 in the revised manuscript.

789

790 **[Editorial Note: This image has been redacted to avoid copyright infringement.]**

791 **Figure 2 | High-fidelity acoustic hologram.** (a) Schematic diagram of hologram  
792 reconstruction. (b) Schematic diagram of how LAM projects high-quality acoustic  
793 hologram in simulation and experiment. (c) The target image of a school badge with  
794 complex amplitude distributions. (d) The simulated holographic image by the APM  
795 method. (e) The simulated holographic image by the PM method. (f-h) Another case of  
796 projecting a more complicated acoustic hologram with the target image an Einstein's  
797 photo. The simulation is conducted by effective parameters.

798

799

800



801 **[Editorial Note: This image has been redacted to avoid copyright infringement.]**

802 Fig. R1. (a) Target image in Ref. 28. (b) Numerical simulation with APM method in  
803 this work. (c) Numerical simulation with PM method in Ref. 28 (Nature 537, 518–522  
804 (2016)).

805

806

807 12) *p.12, L.245: Reference to equation 3 not 5.*

808

809 **Response:** Thank you for pointing it out. In the revised manuscript, we have fixed them.

810

811 13) *p.13, L.265: The Penrose pattern is shown in Figure S3.*

812

813 **Response:** Thank you for pointing it out. In the revised manuscript, the Penrose pattern  
814 is replaced by new experiments as shown in Figs. 5 and 6.

815

816 14) *At various locations throughout the manuscript and in the conclusions the authors*  
817 *speak of “modulating both amplitude and phase of acoustic wave in a precise,*  
818 *continuous and decoupled manner”. This is somewhat misleading as continuous*  
819 *modulation suggests a temporal or dynamic control. The authors should clarify this by*  
820 *stating clearly in the text that they only consider fixed or static acoustic holograms.*

821

822 **Response:** Thank you for pointing it out. In the revised manuscript, we have fixed it  
823 into “[modulating both amplitude and phase of acoustic waves in a static, precise, and](#)  
[decoupled manner.](#)” on **Page 16, lines 331-332** in the revised manuscript.

Reviewers' comments:

Reviewer #1 (Remarks to the Author):

The authors have submitted an improved manuscript, now with additional experiments, explanations and data analysis. In the opinion of the reviewer, all the raised points have been addressed and the reviewer is happy to support its publication.

Reviewer #2 (Remarks to the Author):

The authors have provided satisfactory revisions to this manuscript to merit publication. I recommend acceptance of the current submission.

Reviewer #3 (Remarks to the Author):

The authors have implemented many of my suggestions. However, a few comments remain, including my main criticism that Fig. 1 is misleading, as it suggests something the authors have not managed to demonstrate, and that the figure should therefore be replaced with one that corresponds to the level of complexity that was experimentally demonstrated. I have the following comments for the authors to consider:

- 1) Please chose images for Fig. 1 that are of comparable complexity to the experimental work demonstrated, e.g. the university logo.
- 2) Can you explain why the quality difference between the APM and PM reconstructions are so much higher in Figure 1 than in Figure 5?
- 3) There are some unit errors in the text. In the main text areas should be in  $\text{cm}^2$  (lines 274 and 320) and in the SI please correct  $\text{N}^*\text{s}/\text{m}^3$  (small letter s)
- 4) In line 282 the authors write [...] we introduce the parameter of "image correlation" which has been commonly used for measuring the similarity between the numerical/experimental image and the target one." Please cite an appropriate reference for this claim.

**Referee #1 (Remarks to the Author):**

*The authors have submitted an improved manuscript, now with additional experiments, explanations and data analysis. In the opinion of the reviewer, all the raised points have been addressed and the reviewer is happy to support its publication.*

**Response:** We sincerely thank the referee for recommending our work to be published in **Nature Communications**.

=====

**Referee #2 (Remarks to the Author):**

*The authors have provided satisfactory revisions to this manuscript to merit publication. I recommend acceptance of the current submission.*

**Response:** We sincerely thank the referee for recommending our work to be published in **Nature Communications**.

=====

**Referee #3 (Remarks to the Author):**

*The authors have implemented many of my suggestions. However, a few comments remain, including my main criticism that Fig. 1 is misleading, as it suggests something the authors have not managed to demonstrate, and that the figure should therefore be replaced with one that corresponds to the level of complexity that was experimentally demonstrated. I have the following comments for the authors to consider:*

1) Please chose images for Fig. 1 that are of comparable complexity to the experimental work demonstrated, e.g. the university logo.

**Response:** Thank you for your important suggestion. We have chosen the figure of the university logo by following the referee's suggestion. The much more complicated image of Einstein's photo is moved to Supplementary Figure 4.

**[Editorial Note: This image has been redacted to avoid copyright infringement.]**

**Figure 2 | High-fidelity acoustic hologram.** (a) Schematic diagram of hologram reconstruction. (b) Schematic diagram of how LAM projects high-quality acoustic hologram in simulation and experiment. (c) The target image of a school logo with complex amplitude distributions. (Scale bar, 20cm) (d) The simulated holographic image via the APM method. (e) The simulated holographic image via the PM method.

**[Editorial Note: This image has been redacted to avoid copyright infringement.]**

**Supplementary Figure 4 | Simulations for a complicated image of Einstein's photo.** (a) The target image with a complex amplitude distribution. (Scale bar, 20cm) (b) The generated holographic image via the APM method. (c) The generated holographic image via the PM method.

*2) Can you explain why the quality difference between the APM and PM reconstructions are so much higher in Figure 1 than in Figure 5?*

**Response:** Thank you for this enlightening question. As we know, the complete information of sound field includes amplitude and phase. In light of time-reversal symmetry, it is hence necessary to modulate both the reflection amplitude and phase for achieving an exact hologram reconstruction of a complex image, while the pure-phase scheme is innately unable to perfectly reconstruct the target image due to the lack of amplitude information on the hologram plane. For relatively simple images such as the pattern in Fig. 5(a), the PM method leads to less obvious errors as shown in Fig. 5(f),

due to the amplitude distribution via the APM method on the hologram plane is relatively uniform as shown in Fig. 5(b), albeit the improvement by APM in Fig. 5(d) is still evident by both the naked-eye visual effect and the quantitative evaluation of “image correlation”. However, the image error caused by limiting a uniform amplitude distribution on the hologram plane becomes quite prominent when the target image is complicated and comprises a large number of pixels with uneven amplitude levels. That is the crux responsible for the much higher quality difference between the APM and PM reconstructions as shown in Figs. 2 and 5, which also proves the unique advantage of our proposed approach.

Following the suggestion of the referee, we have added a brief clarification on the higher quality difference between the APM and PM reconstructions in Figs. 2 and 5. Please refer to “Comparing Figs. 2(d) and 2(e), our APM method clearly outperforms the PM method, since in light of time-reversal symmetry it is necessary to modulate both the reflection amplitude and phase for achieving an exact hologram reconstruction of a complex image. We also note that in Fig. 2(e), the image error caused by limiting a uniform amplitude distribution on the hologram plane becomes quite prominent when the target image is complicated and comprises a large number of pixels with uneven amplitude levels. The result demonstrates the effectiveness and flexibility of our method in complicated hologram reconstruction. Simulations for a more complicated hologram (*e.g.*, Einstein’s photo) are provided in Supplementary Fig. 4 to further reveal the advantage of APM method .” on Page 10, lines 199-208 and “For relatively simple images such as the pattern in Fig. 5(a), the PM method leads to less obvious errors as shown in Fig. 5(f), due to the amplitude distribution via the APM method on the hologram plane is relatively uniform as shown in Fig. 5(b), albeit the improvement by APM in Fig. 5(d) is still evident by both the naked-eye visual effect and the quantitative evaluation of “image correlation”.” on Page 13, lines 281-286.

3) *There are some unit errors in the text. In the main text areas should be in cm<sup>2</sup> (lines 274 and 320) and in the SI please correct N\*s/m<sup>3</sup> (small letter s)*

**Response:** Thanks for pointing out the unit errors. We have fixed them.

4) *In line 282 the authors write [...] we introduce the parameter of “image correlation” which has been commonly used for measuring the similarity between the numerical/experimental image and the target one.” Please cite an appropriate reference for this claim.*

**Response:** We have added the reference “34. Lewis, J. Fast template matching. *Vision interface* **95**, 15-19 (1995)”, which is cited at “For a quantitative evaluation of the quality of acoustic hologram, we introduce the parameter of “image correlation” which has been commonly used for measuring the similarity between the numerical/experimental image and the target one<sup>34</sup>.” in lines 275-278 on page 13.

REVIEWERS' COMMENTS:

Reviewer #3 (Remarks to the Author):

The authors have responded to my comments and made appropriate changes to their manuscript.  
Thank you.
